# Supplementary material for: An insight into an intriguing oxidative biotransformation pathway of 5-O-caffeoylquinic acid by a gut bacterium
Source: Royal Society of Chemistry journal article supplement (doi:10.1039/d1fo04304h), 2022-01-01
Supplement: d1fo04304h2.xlsx [file d1fo04304h2.xlsx]

## Sheet: Article_Biotransformation_2_mat
Table S1. List of ions from samples of biotransformation study in PBS at 5.8 after analysis by LC-MS/MS followed by MzMine 2 treatement, MN analysis and dereplication using GNPS library.
feature_id	m/z	retention time (min)	TIC	charge	gnps_name	gnps_adduct	gnps_smiles	gnps_inchi	gnps_inchi_key	gnps_spec_id	gnps_cos	gnps_matched_peaks	gnps_prod	Lreuteri_CQA_SN.mzXML Peak area	PBS control.mzXML Peak area	Lreuteri_PBS_SN.mzXML Peak area	Untreated_L reuteri_Pellet.mzXML Peak area	Lreuteri_PBS_Pellet.mzXML Peak area	Lreuteri _ CQA _pellet.mzXML Peak area	CQA_2mM_PB_.mzXML Peak area	Untreated_Lreuteri_SN.mzXML Peak area
1	179.2	21.5	10652003.0	1.0	|cis-Caffeic acid|2,6-Dihydroxy-1,3-dimethylpurine	[M-H]-|[M-H]-|[M-H]-	O=C(O)/C=C\c1ccc(O)c(O)c1|O=C(O)C=Cc1ccc(O)c(O)c1|Cn1c(=O)c2[nH]cnc2n(C)c1=O	InChI=1S/C9H8O4/c10-7-3-1-6(5-8(7)11)2-4-9(12)13/h1-5,10-11H,(H,12,13)/b4-2-|InChI=1S/C9H8O4/c10-7-3-1-6(5-8(7)11)2-4-9(12)13/h1-5,10-11H,(H,12,13)|InChI=1S/C7H8N4O2/c1-10-5-4(8-3-9-5)6(12)11(2)7(10)13/h3H,1-2H3,(H,8,9)	QAIPRVGONGVQAS-RQOWECAXSA-N|QAIPRVGONGVQAS-UHFFFAOYSA-N|ZFXYFBGIUFBOJW-UHFFFAOYSA-N	CCMSLIB00005464173|CCMSLIB00005729720|CCMSLIB00000573773	1.0|1.0|0.53	5|4|4	4.99|3.99|2.12	557721760.4749988	0.0	0.0	0.0	0.0	176448549.35999942	0.0	0.0
2	179.23	23.46	4866000.0	1.0	|trans-Caffeic acid|2,6-Dihydroxy-1,3-dimethylpurine	[M-H]-|[M-H]-|[M-H]-	O=C(O)/C=C\c1ccc(O)c(O)c1|O=C(O)C=Cc1ccc(O)c(O)c1|Cn1c(=O)c2[nH]cnc2n(C)c1=O	InChI=1S/C9H8O4/c10-7-3-1-6(5-8(7)11)2-4-9(12)13/h1-5,10-11H,(H,12,13)/b4-2-|InChI=1S/C9H8O4/c10-7-3-1-6(5-8(7)11)2-4-9(12)13/h1-5,10-11H,(H,12,13)|InChI=1S/C7H8N4O2/c1-10-5-4(8-3-9-5)6(12)11(2)7(10)13/h3H,1-2H3,(H,8,9)	QAIPRVGONGVQAS-RQOWECAXSA-N|QAIPRVGONGVQAS-UHFFFAOYSA-N|ZFXYFBGIUFBOJW-UHFFFAOYSA-N	CCMSLIB00005464173|CCMSLIB00005739020|CCMSLIB00000573773	1.0|0.99|0.53	5|4|4	4.99|3.97|2.13	259217734.3850005	0.0	0.0	0.0	0.0	181295599.9699999	0.0	0.0
3	353.27	23.63	11496034.0	1.0	Caffeoylquinic acid|CHLOROGENIC|Undulatoside A	[M-H]-|[M-H]-|[M-H]-	O=C(C=Cc1ccc(O)c(O)c1)OC1CC(O)(C(=O)O)CC(O)C1O|O=C(/C=C/c1ccc(O)c(O)c1)O[C@@H]1C[C@](O)(C(=O)O)C[C@@H](O)[C@H]1O|Cc1cc(=O)c2c(O)cc(O[C@@H]3O[C@H](CO)[C@@H](O)[C@H](O)[C@H]3O)cc2o1	InChI=1S/C16H18O9/c17-9-3-1-8(5-10(9)18)2-4-13(20)25-12-7-16(24,15(22)23)6-11(19)14(12)21/h1-5,11-12,14,17-19,21,24H,6-7H2,(H,22,23)|InChI=1S/C16H18O9/c17-9-3-1-8(5-10(9)18)2-4-13(20)25-12-7-16(24,15(22)23)6-11(19)14(12)21/h1-5,11-12,14,17-19,21,24H,6-7H2,(H,22,23)/b4-2+/t11-,12-,14-,16+/m1/s1|InChI=1S/C16H18O9/c1-6-2-8(18)12-9(19)3-7(4-10(12)23-6)24-16-15(22)14(21)13(20)11(5-17)25-16/h2-4,11,13-…	CWVRJTMFETXNAD-UHFFFAOYSA-N|CWVRJTMFETXNAD-JUHZACGLSA-N|BYYDEEAJCDGLER-YMILTQATSA-N	CCMSLIB00000579204|CCMSLIB00004702371|CCMSLIB00004702936	0.92|1.0|0.88	10|9|9	9.2|8.98|7.95	196721177.0150001	0.0	0.0	0.0	0.0	0.0	0.0	0.0
4	353.28	19.27	3762713.0	1.0	Caffeoylquinic acid|Chlorogenic acid from|Undulatoside A	[M-H]-|[M-H]-|[M-H]-	O=C(C=Cc1ccc(O)c(O)c1)OC1CC(O)(C(=O)O)CC(O)C1O|O=C(/C=C/c1ccc(O)c(O)c1)O[C@@H]1C[C@](O)(C(=O)O)C[C@@H](O)[C@H]1O|Cc1cc(=O)c2c(O)cc(O[C@@H]3O[C@H](CO)[C@@H](O)[C@H](O)[C@H]3O)cc2o1	InChI=1S/C16H18O9/c17-9-3-1-8(5-10(9)18)2-4-13(20)25-12-7-16(24,15(22)23)6-11(19)14(12)21/h1-5,11-12,14,17-19,21,24H,6-7H2,(H,22,23)|InChI=1S/C16H18O9/c17-9-3-1-8(5-10(9)18)2-4-13(20)25-12-7-16(24,15(22)23)6-11(19)14(12)21/h1-5,11-12,14,17-19,21,24H,6-7H2,(H,22,23)/b4-2+/t11-,12-,14-,16+/m1/s1|InChI=1S/C16H18O9/c1-6-2-8(18)12-9(19)3-7(4-10(12)23-6)24-16-15(22)14(21)13(20)11(5-17)25-16/h2-4,11,13-…	CWVRJTMFETXNAD-UHFFFAOYSA-N|CWVRJTMFETXNAD-JUHZACGLSA-N|BYYDEEAJCDGLER-YMILTQATSA-N	CCMSLIB00000579204|CCMSLIB00003134656|CCMSLIB00004702936	0.93|0.99|0.88	12|11|11	11.11|10.94|9.72	229825120.53500053	0.0	0.0	0.0	0.0	0.0	215314125.05000013	0.0
5	707.18	19.27	201602.0	1.0										140441644.26000038	0.0	0.0	0.0	0.0	0.0	91393394.94500016	0.0
6	135.33	21.5	647000.0	1.0										215559188.50999963	0.0	0.0	0.0	0.0	72644072.33499976	0.0	0.0
7	367.33	21.48	24796233.0	1.0	Dihydropertusaric|Murolic acid|Dihydromuronic acid	[M-H]-|[M-H]-|[M-H]-	CC(=O)CCCCCCCCCCCCC[C@@H]1OC(=O)C(C)[C@@H]1C(=O)O|C=C1C(=O)O[C@H](CCCCCCCCCCCCC[C@H](C)O)C1C(=O)O|CC(=O)CCCCCCCCCCCCC[C@H]1OC(=O)C(C)C1C(=O)O	InChI=1S/C21H36O5/c1-16(22)14-12-10-8-6-4-3-5-7-9-11-13-15-18-19(20(23)24)17(2)21(25)26-18/h17-19H,3-15H2,1-2H3,(H,23,24)/t17?,18-,19-/m0/s1|InChI=1S/C21H36O5/c1-16(22)14-12-10-8-6-4-3-5-7-9-11-13-15-18-19(20(23)24)17(2)21(25)26-18/h16,18-19,22H,2-15H2,1H3,(H,23,24)/t16-,18+,19?/m0/s1|InChI=1S/C21H36O5/c1-16(22)14-12-10-8-6-4-3-5-7-9-11-13-15-18-19(20(23)24)17(2)21(25)26-18/h17-19H,3-15H2,1-2H3,(…	SPGPUDJMXMJNCU-MNNMKWMVSA-N|UYUDMGMNHAKPEV-CXEJCQMISA-N|SPGPUDJMXMJNCU-JLAWEPINSA-N	CCMSLIB00005719043|CCMSLIB00004751350|CCMSLIB00004751213	0.94|0.81|0.8	10|10|10	9.43|8.12|7.97	107607210.12499976	0.0	0.0	0.0	0.0	0.0	0.0	0.0
8	729.25	19.27	6814201.0	1.0										103998841.29000032	0.0	0.0	0.0	0.0	0.0	85929949.27500014	0.0
9	381.2	23.44	12195307.0	1.0	9-[[3-methyl-3-[(4-methyl-5-oxo-2H-furan-2-yl)methyl]oxiran-2-yl]methoxy]furo[3,2-g]chromen-7-one|	[M-H]-|[2M-2H+Na]-	CC1=CC(CC2(C)OC2COc2c3occc3cc3ccc(=O)oc23)OC1=O|Cn1c(=O)c2[nH]cnc2n(C)c1=O	InChI=1S/C21H18O7/c1-11-7-14(26-20(11)23)9-21(2)15(28-21)10-25-19-17-13(5-6-24-17)8-12-3-4-16(22)27-18(12)19/h3-8,14-15H,9-10H2,1-2H3|InChI=1S/C7H8N4O2/c1-10-5-4(8-3-9-5)6(12)11(2)7(10)13/h3H,1-2H3,(H,8,9)	CISFAPDYRQPRCZ-UHFFFAOYSA-N|ZFXYFBGIUFBOJW-UHFFFAOYSA-N	CCMSLIB00004700475|CCMSLIB00005464248	0.74|0.65	11|5	8.18|3.26	92030164.74500026	0.0	0.0	0.0	0.0	51817705.42499995	0.0	0.0
10	135.32	23.44	281000.0	1.0	Hypoxanthine|d-LIMONENE	[M-H]-|[M-H]-	Oc1ncnc2[nH]cnc12|C=C(C)[C@H]1CC=C(C)CC1	InChI=1S/C5H4N4O/c10-5-3-4(7-1-6-3)8-2-9-5/h1-2H,(H2,6,7,8,9,10)|InChI=1S/C10H16/c1-8(2)10-6-4-9(3)5-7-10/h4,10H,1,5-7H2,2-3H3/t10-/m0/s1	FDGQSTZJBFJUBT-UHFFFAOYSA-N|XMGQYMWWDOXHJM-JTQLQIEISA-N	CCMSLIB00004717215|CCMSLIB00004721545	0.81|0.42	5|4	4.06|1.68	109919529.86500034	0.0	0.0	0.0	0.0	72149133.02499999	0.0	0.0
11	463.28	43.39	3314201.0	1.0	isoetin 5'-O-glucopyranoside|quercetin 7-O-glucopyranoside|Isoquercitin from	[M-H]-|[M-H]-|[M-H]-	O=c1cc(-c2cc(O[C@H]3O[C@H](CO)[C@H](O)C(O)C3O)c(O)cc2O)oc2cc(O)cc(O)c12|O=c1c(O)c(-c2ccc(O)c(O)c2)oc2cc(O[C@@H]3O[C@H](CO)[C@@H](O)C(O)[C@H]3O)cc(O)c12|O=c1c(O[C@@H]2O[C@H]([C@H](O)CO)[C@H](O)[C@H]2O)c(-c2ccc(O)c(O)c2)oc2cc(O)cc(O)c12	InChI=1S/C21H20O12/c22-6-16-18(28)19(29)20(30)21(33-16)32-14-3-8(9(24)4-10(14)25)13-5-12(27)17-11(26)1-7(23)2-15(17)31-13/h1-5,16,18-26,28-30H,6H2/t16-,18+,19?,20?,21+/m1/s1|InChI=1S/C21H20O12/c22-6-13-15(26)17(28)19(30)21(33-13)31-8-4-11(25)14-12(5-8)32-20(18(29)16(14)27)7-1-2-9(23)10(24)3-7/h1-5,13,15,17,19,21-26,28-30H,6H2/t13-,15-,17?,19-,21-/m1/s1|InChI=1S/C21H20O12/c22-6-12(27)19-16(29)17(3…	CRQGZKQQBXIWSE-IUDHNKCCSA-N|BBFYUPYFXSSMNV-LJHNHMFVSA-N|OPJZLUXFQFQYAI-GNPVFZCLSA-N	CCMSLIB00006126933|CCMSLIB00006126925|CCMSLIB00003134899	1.0|0.98|0.79	27|27|24	26.87|26.4|18.92	90437217.93499994	0.0	0.0	0.0	0.0	5038046.065000062	0.0	0.0
12	177.24	20.2	798300.0	1.0	esculetin|Haematommic acid|7,8-Dihydroxycoumarin	[M-H]-|[M-H-H2O]-|[M-H]-	O=c1ccc2cc(O)c(O)cc2o1|Cc1cc(O)c(C=O)c(O)c1C(=O)O|O=c1ccc2ccc(O)c(O)c2o1	InChI=1S/C9H6O4/c10-6-3-5-1-2-9(12)13-8(5)4-7(6)11/h1-4,10-11H|InChI=1S/C9H8O5/c1-4-2-6(11)5(3-10)8(12)7(4)9(13)14/h2-3,11-12H,1H3,(H,13,14)|InChI=1S/C9H6O4/c10-6-3-1-5-2-4-7(11)13-9(5)8(6)12/h1-4,10,12H	ILEDWLMCKZNDJK-UHFFFAOYSA-N|KCOOTJRKKIDHTM-UHFFFAOYSA-N|ATEFPOUAMCWAQS-UHFFFAOYSA-N	CCMSLIB00004696260|CCMSLIB00005719020|CCMSLIB00005741053	1.0|0.82|0.96	6|6|5	5.97|4.95|4.8	87315740.14500026	0.0	0.0	0.0	0.0	92735409.81999984	0.0	0.0
13	729.25	23.86	4712506.0	1.0										52788967.04000016	0.0	0.0	0.0	0.0	0.0	37379816.65499996	0.0
14	367.3	35.74	2088901.0	1.0	methyl (1S,3R,4R,5R)-3-[(E)-3-(3,4-dihydroxyphenyl)prop-2-enoyl]oxy-1,4,5-trihydroxycyclohexane-1-carboxylate	[M-H]-	COC(=O)[C@]1(O)C[C@@H](O)[C@@H](O)[C@H](OC(=O)/C=C/c2ccc(O)c(O)c2)C1	InChI=1S/C17H20O9/c1-25-16(23)17(24)7-12(20)15(22)13(8-17)26-14(21)5-3-9-2-4-10(18)11(19)6-9/h2-6,12-13,15,18-20,22,24H,7-8H2,1H3/b5-3+/t12-,13-,15-,17+/m1/s1	MZNIJRAPCCELQX-AWOKGZDASA-N	CCMSLIB00000846156	0.71	6	4.29	97217953.05500026	0.0	0.0	0.0	0.0	0.0	59603387.31499995	0.0
15	191.32	19.25	21610.0	1.0	4-oxo-5-phenylpentanoic acid|Quinate|Quinic acid	[M-H]-|[M-H]-|[M-H]-	O=C(O)CCC(=O)Cc1ccccc1|O=C(O)C1(O)C[C@@H](O)C(O)[C@H](O)C1|O=C(O)[C@]1(O)C[C@@H](O)[C@H](O)[C@H](O)C1	InChI=1S/C11H12O3/c12-10(6-7-11(13)14)8-9-4-2-1-3-5-9/h1-5H,6-8H2,(H,13,14)|InChI=1S/C7H12O6/c8-3-1-7(13,6(11)12)2-4(9)5(3)10/h3-5,8-10,13H,1-2H2,(H,11,12)/t3-,4-,5?,7?/m1/s1|InChI=1S/C7H12O6/c8-3-1-7(13,6(11)12)2-4(9)5(3)10/h3-5,8-10,13H,1-2H2,(H,11,12)/t3-,4-,5-,7-/m1/s1	LTNSOYZGFPWHOF-UHFFFAOYSA-N|AAWZDTNXLSGCEK-LNVDRNJUSA-N|AAWZDTNXLSGCEK-FNKGTGPASA-N	CCMSLIB00004712167|CCMSLIB00000570649|CCMSLIB00005729057	0.73|0.4|0.4	7|4|4	5.14|1.62|1.62	70981437.5700002	0.0	0.0	0.0	0.0	0.0	70466644.21000005	0.0
16	359.03	21.5	371600.0	1.0										62345362.58499984	0.0	0.0	0.0	0.0	8804561.419999968	0.0	0.0
17	375.4	19.25	919230.0	1.0	Pseudoplacodiolic acid|Usnic acid|Placodiolic acid	[M-H]-|[M-H+CH3OH]-|[M-H]-	COC12CC(O)=C(C(C)=O)C(=O)C1(C)c1c(O)c(C)c(O)c(C(C)=O)c1O2|CC(=O)C1=C(O)C=C2Oc3c(C(C)=O)c(O)c(C)c(O)c3C2(C)C1=O|COC12CC(O)=C(C(C)=O)C(=O)C1(C)c1c(O)c(C(C)=O)c(O)c(C)c1O2	InChI=1S/C19H20O8/c1-7-14(23)12(9(3)21)16-13(15(7)24)18(4)17(25)11(8(2)20)10(22)6-19(18,26-5)27-16/h22-24H,6H2,1-5H3|InChI=1S/C18H16O7/c1-6-14(22)12(8(3)20)16-13(15(6)23)18(4)10(25-16)5-9(21)11(7(2)19)17(18)24/h5,21-23H,1-4H3|InChI=1S/C19H20O8/c1-7-14(23)12(9(3)21)15(24)13-16(7)27-19(26-5)6-10(22)11(8(2)20)17(25)18(13,19)4/h22-24H,6H2,1-5H3	WWSUFZCWOJULTK-UHFFFAOYSA-N|WEYVVCKOOFYHRW-UHFFFAOYSA-N|VEZRSCFWYNSNPR-UHFFFAOYSA-N	CCMSLIB00004751320|CCMSLIB00005718997|CCMSLIB00004751319	0.52|0.5|0.48	43|41|43	22.44|20.56|20.52	77932389.86000022	0.0	0.0	0.0	0.0	0.0	76408599.76500003	0.0
18	375.37	23.86	1473502.0	1.0	Pseudoplacodiolic acid|Placodiolic acid|Usnic acid	[M-H]-|[M-H]-|[M-H+CH3OH]-	COC12CC(O)=C(C(C)=O)C(=O)C1(C)c1c(O)c(C)c(O)c(C(C)=O)c1O2|COC12CC(O)=C(C(C)=O)C(=O)C1(C)c1c(O)c(C(C)=O)c(O)c(C)c1O2|CC(=O)C1=C(O)C=C2Oc3c(C(C)=O)c(O)c(C)c(O)c3C2(C)C1=O	InChI=1S/C19H20O8/c1-7-14(23)12(9(3)21)16-13(15(7)24)18(4)17(25)11(8(2)20)10(22)6-19(18,26-5)27-16/h22-24H,6H2,1-5H3|InChI=1S/C19H20O8/c1-7-14(23)12(9(3)21)15(24)13-16(7)27-19(26-5)6-10(22)11(8(2)20)17(25)18(13,19)4/h22-24H,6H2,1-5H3|InChI=1S/C18H16O7/c1-6-14(22)12(8(3)20)16-13(15(6)23)18(4)10(25-16)5-9(21)11(7(2)19)17(18)24/h5,21-23H,1-4H3	WWSUFZCWOJULTK-UHFFFAOYSA-N|VEZRSCFWYNSNPR-UHFFFAOYSA-N|WEYVVCKOOFYHRW-UHFFFAOYSA-N	CCMSLIB00004751320|CCMSLIB00004751319|CCMSLIB00005718997	0.61|0.55|0.6	38|38|34	23.25|21.05|20.42	63780337.50499998	0.0	0.0	0.0	0.0	0.0	58225285.87000001	0.0
19	191.32	23.63	25211.0	1.0	4-oxo-5-phenylpentanoic acid|1H-2-benzopyran-1-one, 6,8-dihydroxy-3-methyl-|	[M-H]-|[M-H]-|[M-H]-	O=C(O)CCC(=O)Cc1ccccc1|Cc1cc2cc(O)cc(O)c2c(=O)o1|O=C(O)[C@@]1(O)CC(O)[C@H](O)[C@H](O)C1	InChI=1S/C11H12O3/c12-10(6-7-11(13)14)8-9-4-2-1-3-5-9/h1-5H,6-8H2,(H,13,14)|InChI=1S/C10H8O4/c1-5-2-6-3-7(11)4-8(12)9(6)10(13)14-5/h2-4,11-12H,1H3|InChI=1S/C7H12O6/c8-3-1-7(13,6(11)12)2-4(9)5(3)10/h3-5,8-10,13H,1-2H2,(H,11,12)/t3-,4?,5-,7+/m1/s1	LTNSOYZGFPWHOF-UHFFFAOYSA-N|OHHKDUWFPNAEHQ-UHFFFAOYSA-N|AAWZDTNXLSGCEK-RKGSPJAZSA-N	CCMSLIB00004712166|CCMSLIB00004692253|CCMSLIB00005464338	0.83|0.57|0.5	6|8|6	4.99|4.57|2.99	49530633.58499999	0.0	0.0	0.0	0.0	0.0	0.0	0.0
20	381.3	44.84	3510700.0	1.0		[2M-2H+Na]-	Cn1c(=O)c2[nH]cnc2n(C)c1=O	InChI=1S/C7H8N4O2/c1-10-5-4(8-3-9-5)6(12)11(2)7(10)13/h3H,1-2H3,(H,8,9)	ZFXYFBGIUFBOJW-UHFFFAOYSA-N	CCMSLIB00005464248	0.85	6	5.09	44111286.009999536	0.0	0.0	0.0	0.0	0.0	13058400.20499982	0.0
21	367.3	39.66	2721102.0	1.0	methyl (1S,3R,4R,5R)-3-[(E)-3-(3,4-dihydroxyphenyl)prop-2-enoyl]oxy-1,4,5-trihydroxycyclohexane-1-carboxylate	[M-H]-	COC(=O)[C@]1(O)C[C@@H](O)[C@@H](O)[C@H](OC(=O)/C=C/c2ccc(O)c(O)c2)C1	InChI=1S/C17H20O9/c1-25-16(23)17(24)7-12(20)15(22)13(8-17)26-14(21)5-3-9-2-4-10(18)11(19)6-9/h2-6,12-13,15,18-20,22,24H,7-8H2,1H3/b5-3+/t12-,13-,15-,17+/m1/s1	MZNIJRAPCCELQX-AWOKGZDASA-N	CCMSLIB00000846156	0.7	6	4.19	44663099.38500038	0.0	0.0	0.0	0.0	0.0	23258973.255000085	0.0
22	383.31	21.55	451691.0	1.0	Solorinic acid|5-[(Z)-12-(3,5-dihydroxyphenyl)dodec-8-enyl]benzene-1,3-diol|Voacristine	[M-H]-|[M-H]-|[M-H]-	CCCCCC(=O)c1c(O)cc2c(c1O)C(=O)c1c(O)cc(OC)cc1C2=O|Oc1cc(O)cc(CCC/C=C\CCCCCCCc2cc(O)cc(O)c2)c1|COC(=O)C12CC3CC(C(C)O)C1N(CCc1c2[nH]c2ccc(OC)cc12)C3	InChI=1S/C21H20O7/c1-3-4-5-6-13(22)18-15(24)9-12-17(21(18)27)20(26)16-11(19(12)25)7-10(28-2)8-14(16)23/h7-9,23-24,27H,3-6H2,1-2H3|InChI=1S/C24H32O4/c25-21-13-19(14-22(26)17-21)11-9-7-5-3-1-2-4-6-8-10-12-20-15-23(27)18-24(28)16-20/h3,5,13-18,25-28H,1-2,4,6-12H2/b5-3-|InChI=1S/C22H28N2O4/c1-12(25)16-8-13-10-22(21(26)28-3)19-15(6-7-24(11-13)20(16)22)17-9-14(27-2)4-5-18(17)23-19/h4-5,9,12-13,16,20,23…	MLTVHORGISIISB-UHFFFAOYSA-N|JDIDEXHTJXTVES-HYXAFXHYSA-N|OYMQKBZMKFJPMH-UHFFFAOYSA-N	CCMSLIB00004751387|CCMSLIB00004712838|CCMSLIB00005745578	0.93|0.98|0.87	11|7|4	10.2|6.88|3.49	38324534.95999994	0.0	0.0	0.0	0.0	15419575.16499995	0.0	0.0
23	381.34	48.04	2339852.0	1.0		[2M-2H+Na]-	Cn1c(=O)c2[nH]cnc2n(C)c1=O	InChI=1S/C7H8N4O2/c1-10-5-4(8-3-9-5)6(12)11(2)7(10)13/h3H,1-2H3,(H,8,9)	ZFXYFBGIUFBOJW-UHFFFAOYSA-N	CCMSLIB00005464248	0.86	5	4.32	21217117.3949998	0.0	0.0	0.0	0.0	0.0	5356832.734999964	0.0
24	300.43	43.29	170070.0	1.0										21333478.30499999	0.0	0.0	0.0	0.0	0.0	0.0	0.0
25	447.43	47.98	1669442.0	1.0	(6,6-Dimethylbicyclo[3.1.1]hept-2-yl)methyl 6-O-[(2R,3R,4R)-3,4-dihydroxy-4-(hydroxymethyl)tetrahydro-2-furanyl]-beta-D-glucopyranoside	[M-H]-	CC1(C)C2CCC(CO[C@@H]3O[C@H](CO[C@@H]4OC[C@](O)(CO)[C@H]4O)[C@@H](O)[C@H](O)[C@H]3O)C1C2	InChI=1S/C21H36O10/c1-20(2)11-4-3-10(12(20)5-11)6-28-18-16(25)15(24)14(23)13(31-18)7-29-19-17(26)21(27,8-22)9-30-19/h10-19,22-27H,3-9H2,1-2H3/t10?,11?,12?,13-,14-,15+,16-,17+,18-,19-,21-/m1/s1	RSKTWDAINBIMPD-MCVCZSGFSA-N	CCMSLIB00000850205	0.48	3	1.43	13856047.83999993	0.0	0.0	0.0	0.0	0.0	0.0	0.0
26	403.22	23.44	308920.0	1.0	Strophanthidin|ascochlorin	[M-H]-|[M-H]-	C[C@]12CC[C@H]3[C@@H](CC[C@]4(O)C[C@@H](O)CC[C@]34C=O)[C@@]1(O)CC[C@@H]2C1=CC(=O)OC1|CC(/C=C/[C@@]1(C)[C@H](C)CCC(=O)[C@@H]1C)=C\Cc1c(O)c(Cl)c(C)c(C=O)c1O	InChI=1S/C23H32O6/c1-20-6-3-17-18(4-8-22(27)11-15(25)2-7-21(17,22)13-24)23(20,28)9-5-16(20)14-10-19(26)29-12-14/h10,13,15-18,25,27-28H,2-9,11-12H2,1H3/t15-,16+,17-,18+,20+,21-,22-,23-/m0/s1|InChI=1S/C23H29ClO4/c1-13(10-11-23(5)14(2)7-9-19(26)16(23)4)6-8-17-21(27)18(12-25)15(3)20(24)22(17)28/h6,10-12,14,16,27-28H,7-9H2,1-5H3/b11-10+,13-6+/t14-,16+,23+/m1/s1	ODJLBQGVINUMMR-HZXDTFASSA-N|SETVRSKZJJWOPA-FLDGXQSCSA-N	CCMSLIB00004694316|CCMSLIB00004685172	0.7|0.75	10|3	6.97|2.25	19770900.54000003	0.0	0.0	0.0	0.0	18399746.94500004	0.0	0.0
27	271.48	43.29	35090.0	1.0										13154165.069999993	0.0	0.0	0.0	0.0	0.0	0.0	0.0
28	359.17	17.5	367525.0	1.0										17462965.280000024	0.0	0.0	0.0	0.0	0.0	0.0	0.0
29	137.2	15.05	36200.0	1.0										9309432.549999984	0.0	0.0	0.0	0.0	1384977.5850000016	0.0	0.0
30	177.31	23.56	84700.0	1.0	Haematommic acid|esculetin|D-GLUCONATE	[M-H-H2O]-|[M-H]-|[M-H-H2O]-	Cc1cc(O)c(C=O)c(O)c1C(=O)O|O=c1ccc2cc(O)c(O)cc2o1|O=C(O)C(O)C(O)C(O)C(O)CO	InChI=1S/C9H8O5/c1-4-2-6(11)5(3-10)8(12)7(4)9(13)14/h2-3,11-12H,1H3,(H,13,14)|InChI=1S/C9H6O4/c10-6-3-5-1-2-9(12)13-8(5)4-7(6)11/h1-4,10-11H|InChI=1S/C6H12O7/c7-1-2(8)3(9)4(10)5(11)6(12)13/h2-5,7-11H,1H2,(H,12,13)	KCOOTJRKKIDHTM-UHFFFAOYSA-N|ILEDWLMCKZNDJK-UHFFFAOYSA-N|RGHNJXZEOKUKBD-UHFFFAOYSA-N	CCMSLIB00005719020|CCMSLIB00004696260|CCMSLIB00000578213	0.84|1.0|0.73	5|4|5	4.2|3.98|3.65	13038028.65000002	0.0	0.0	0.0	0.0	11371332.77000001	0.0	0.0
31	435.17	35.55	425311.0	1.0										10688412.535000026	0.0	0.0	0.0	0.0	0.0	0.0	0.0
32	449.13	44.64	312743.0	1.0										4841396.709999917	0.0	0.0	0.0	0.0	0.0	0.0	0.0
33	337.14	25.54	357287.0	1.0	Coumaroyl quinic acid (isomer of 758, 760)	[M-H]-	O=C(C=Cc1ccc(O)cc1)OC1CC(O)(C(=O)O)CC(O)C1O	InChI=1S/C16H18O8/c17-10-4-1-9(2-5-10)3-6-13(19)24-12-8-16(23,15(21)22)7-11(18)14(12)20/h1-6,11-12,14,17-18,20,23H,7-8H2,(H,21,22)	BMRSEYFENKXDIS-UHFFFAOYSA-N	CCMSLIB00005747504	0.97	4	3.87	5024869.8700000215	0.0	0.0	0.0	0.0	0.0	0.0	0.0
34	335.2	31.03	426501.0	1.0	2-(4a,9,10a-trihydroxy-1-methyl-5,10-dioxo-3,4-dihydro-1H-benzo[g]isochromen-3-yl)acetic acid	[M-H]-	CC1OC(CC(=O)O)CC2(O)C(=O)c3cccc(O)c3C(=O)C12O	InChI=1S/C16H16O8/c1-7-16(23)14(21)12-9(3-2-4-10(12)17)13(20)15(16,22)6-8(24-7)5-11(18)19/h2-4,7-8,17,22-23H,5-6H2,1H3,(H,18,19)	JJKCJXIYVNHIOS-UHFFFAOYSA-N	CCMSLIB00004710167	0.43	8	3.47	7325076.844999988	0.0	0.0	0.0	0.0	0.0	4847610.020000005	0.0
35	451.25	47.37	386300.0	1.0										7034046.590000018	0.0	0.0	0.0	0.0	0.0	0.0	0.0
36	533.16	17.56	214331.0	1.0	ANTIMYCIN A (A1 shown)	[M-H]-	CCCCC[C@H]1C(=O)O[C@H](C)[C@H](N=C(O)c2cccc(N=CO)c2O)C(=O)O[C@@H](C)[C@@H]1OC(=O)CC(C)C	InChI=1S/C27H38N2O9/c1-6-7-8-10-19-24(38-21(31)13-15(2)3)17(5)37-27(35)22(16(4)36-26(19)34)29-25(33)18-11-9-12-20(23(18)32)28-14-30/h9,11-12,14-17,19,22,24,32H,6-8,10,13H2,1-5H3,(H,28,30)(H,29,33)/t16-,17+,19-,22+,24+/m1/s1	ZVYMCLIDNNTNCL-GFRRLMGDSA-N	CCMSLIB00004721128	0.63	3	1.88	6086392.304999981	0.0	0.0	0.0	0.0	0.0	0.0	0.0
37	707.25	15.88	209701.0	1.0										4547963.590000005	0.0	0.0	0.0	0.0	0.0	0.0	0.0
38	335.21	33.33	309390.0	1.0	2-(4a,9,10a-trihydroxy-1-methyl-5,10-dioxo-3,4-dihydro-1H-benzo[g]isochromen-3-yl)acetic acid|(6Z,8	[M-H]-|[M-H]-	CC1OC(CC(=O)O)CC2(O)C(=O)c3cccc(O)c3C(=O)C12O|CCCCC/C=C\C[C@@H](O)/C=C/C=C/C=C\[C@@H](O)CCCC(=O)O	InChI=1S/C16H16O8/c1-7-16(23)14(21)12-9(3-2-4-10(12)17)13(20)15(16,22)6-8(24-7)5-11(18)19/h2-4,7-8,17,22-23H,5-6H2,1H3,(H,18,19)|InChI=1S/C20H32O4/c1-2-3-4-5-6-9-13-18(21)14-10-7-8-11-15-19(22)16-12-17-20(23)24/h6-11,14-15,18-19,21-22H,2-5,12-13,16-17H2,1H3,(H,23,24)/b8-7+,9-6-,14-10+,15-11-/t18-,19-/m1/s1	JJKCJXIYVNHIOS-UHFFFAOYSA-N|VNYSSYRCGWBHLG-AMOLWHMGSA-N	CCMSLIB00004710167|CCMSLIB00005752618	0.55|0.45	16|4	8.8|1.8	3124526.625000053	0.0	0.0	0.0	0.0	0.0	0.0	0.0
39	295.15	51.64	111740.0	1.0										0.0	7743213.490000009	8116947.424999942	0.0	10126446.029999984	9070656.715000013	0.0	7999250.25999997
40	165.22	28.32	1625900.0	1.0	3-phenyllactic acid|Caffeyl alcohol	[M-H]-|[M-H]-	O=C(O)C(O)Cc1ccccc1|OCC=Cc1ccc(O)c(O)c1	InChI=1S/C9H10O3/c10-8(9(11)12)6-7-4-2-1-3-5-7/h1-5,8,10H,6H2,(H,11,12)|InChI=1S/C9H10O3/c10-5-1-2-7-3-4-8(11)9(12)6-7/h1-4,6,10-12H,5H2	VOXXWSYKYCBWHO-UHFFFAOYSA-N|ZCKDCRKBURQZPT-UHFFFAOYSA-N	CCMSLIB00004709761|CCMSLIB00005741330	0.84|0.72	6|4	5.05|2.86	0.0	0.0	0.0	47219189.87000001	0.0	0.0	0.0	92113850.89500004
41	723.67	49.91	4095027.0	1.0										0.0	0.0	0.0	18321425.669999875	15829936.110000255	14995911.940000022	38072242.39499966	0.0
42	887.75	51.84	6334200.0	1.0	[2-[icosa-5.8.11-trienoyloxy]-3-(octadecanoyloxy)propoxy]({[2.3.4.5.6-pentahydroxycyclohexyl]oxy})phosphinic acid|PI(18:0/20:3)
43	949.77	51.33	2059010.0	1.0										0.0	0.0	0.0	11442942.654999815	13175952.965000022	10101468.344999922	0.0	0.0
44	131.19	21.71	317800.0	1.0	2-Hydroxy-4-methylpentanoic acid|2-hydroxy-4-methyl-delta-Valerate|2-Hydroxyhexanoic acid	[M-H]-|[M-H]-|[M-H]-	CC(C)CC(O)C(=O)O|CC(C)C[C@@H](O)C(=O)O|CCCCC(O)C(=O)O	InChI=1S/C6H12O3/c1-4(2)3-5(7)6(8)9/h4-5,7H,3H2,1-2H3,(H,8,9)|InChI=1S/C6H12O3/c1-4(2)3-5(7)6(8)9/h4-5,7H,3H2,1-2H3,(H,8,9)/t5-/m1/s1|InChI=1S/C6H12O3/c1-2-3-4-5(7)6(8)9/h5,7H,2-4H2,1H3,(H,8,9)	LVRFTAZAXQPQHI-UHFFFAOYSA-N|LVRFTAZAXQPQHI-RXMQYKEDSA-N|NYHNVHGFPZAZGA-UHFFFAOYSA-N	CCMSLIB00005729637|CCMSLIB00000565716|CCMSLIB00005729643	0.94|0.82|0.98	4|4|3	3.76|3.26|2.93	0.0	0.0	0.0	14094123.004999995	0.0	0.0	0.0	28721709.260000035
45	355.41	28.26	1208090.0	1.0	Portentol||Flavanone base + 4O, 1Prenyl	[M-H+HCOOH]-|[M-H]-|[M-H]-	CC1OC2(C(C)C(O)C1C)C(C)C1OC(=O)C2(C)C(=O)C1C|C[C@H](C(N)=O)N1CCCC[C@H]1c1ccc(OCc2cccc(F)c2)cc1|CC(C)=CCc1c(O)cc(O)c2c1OCC(c1ccc(O)cc1O)C2=O	InChI=1S/C17H26O5/c1-7-11(5)22-17(9(3)12(7)18)10(4)13-8(2)14(19)16(17,6)15(20)21-13/h7-13,18H,1-6H3|InChI=1S/C21H25FN2O2/c1-15(21(23)25)24-12-3-2-7-20(24)17-8-10-19(11-9-17)26-14-16-5-4-6-18(22)13-16/h4-6,8-11,13,15,20H,2-3,7,12,14H2,1H3,(H2,23,25)/t15-,20+/m1/s1|InChI=1S/C20H20O6/c1-10(2)3-5-13-16(23)8-17(24)18-19(25)14(9-26-20(13)18)12-6-4-11(21)7-15(12)22/h3-4,6-8,14,21-24H,5,9H2,1-2H3	CVPVGRDVSAJUQS-UHFFFAOYSA-N|DCHBITHJABIYOA-QRWLVFNGSA-N|MERHMOCEIBOOMA-UHFFFAOYSA-N	CCMSLIB00004751212|CCMSLIB00004722141|CCMSLIB00005743762	0.96|0.97|0.7	18|4|4	17.32|3.89|2.79	0.0	0.0	0.0	12197675.379999973	0.0	0.0	0.0	23360452.23000001
46	287.41	21.65	546180.0	1.0		[M-H]-	C[C@]12CC[C@@H]3c4ccc(O)cc4CC[C@H]3[C@@H]1C[C@@H](O)[C@@H]2O	InChI=1S/C18H24O3/c1-18-7-6-13-12-5-3-11(19)8-10(12)2-4-14(13)15(18)9-16(20)17(18)21/h3,5,8,13-17,19-21H,2,4,6-7,9H2,1H3/t13-,14-,15+,16-,17+,18+/m1/s1	PROQIPRRNZUXQM-ZXXIGWHRSA-N	CCMSLIB00004694303	0.97	9	8.77	0.0	0.0	0.0	8292373.9199999925	0.0	0.0	0.0	13719358.485000035
47	147.28	28.29	22100.0	1.0	trans-Cinnamic acid|Cinnamic acid|citramalic acid|2-hydroxy-2-methylbutanedioic acid	[M-H]-|[M-H]-|[M-H]-	O=C(O)C=Cc1ccccc1|O=C(O)/C=C/c1ccccc1|CC(O)(CC(=O)O)C(=O)O	InChI=1S/C9H8O2/c10-9(11)7-6-8-4-2-1-3-5-8/h1-7H,(H,10,11)|InChI=1S/C9H8O2/c10-9(11)7-6-8-4-2-1-3-5-8/h1-7H,(H,10,11)/b7-6+|InChI=1S/C5H8O5/c1-5(10,4(8)9)2-3(6)7/h10H,2H2,1H3,(H,6,7)(H,8,9)	WBYWAXJHAXSJNI-UHFFFAOYSA-N|WBYWAXJHAXSJNI-VOTSOKGWSA-N|XFTRTWQBIOMVPK-UHFFFAOYSA-N	CCMSLIB00005729612|CCMSLIB00004691490|CCMSLIB00005755272	0.88|0.5|0.86	4|7|4	3.53|3.5|3.45	0.0	0.0	0.0	10471647.495000003	0.0	0.0	0.0	18632239.66499999
48	204.22	36.28	485800.0	1.0	DL-Indole-3-lactic acid from	[M-H]-	O=C(O)C(O)Cc1c[nH]c2ccccc12	InChI=1S/C11H11NO3/c13-10(11(14)15)5-7-6-12-9-4-2-1-3-8(7)9/h1-4,6,10,12-13H,5H2,(H,14,15)	XGILAAMKEQUXLS-UHFFFAOYSA-N	CCMSLIB00003140198	0.9	17	15.38	0.0	0.0	0.0	6280865.12000006	0.0	0.0	0.0	9227179.045000004
49	233.27	28.29	217530.0	1.0										0.0	0.0	0.0	5454384.714999993	0.0	0.0	0.0	10725255.235000003
50	354.98	20.22	405760.0	1.0										0.0	0.0	0.0	0.0	0.0	8123360.294999971	0.0	0.0
51	145.16	11.97	262237.0	1.0	|Glutamine (D)|Levoglutamide	[M-H]-|[M-H]-|[M-H]-	O=C(O)CCCCC(=O)O|N=C(O)CC[C@@H](N)C(=O)O|NC(=O)CC[C@H](N)C(=O)O	InChI=1S/C6H10O4/c7-5(8)3-1-2-4-6(9)10/h1-4H2,(H,7,8)(H,9,10)|InChI=1S/C5H10N2O3/c6-3(5(9)10)1-2-4(7)8/h3H,1-2,6H2,(H2,7,8)(H,9,10)/t3-/m1/s1|InChI=1S/C5H10N2O3/c6-3(5(9)10)1-2-4(7)8/h3H,1-2,6H2,(H2,7,8)(H,9,10)/t3-/m0/s1	WNLRTRBMVRJNCN-UHFFFAOYSA-N|ZDXPYRJPNDTMRX-GSVOUGTGSA-N|ZDXPYRJPNDTMRX-VKHMYHEASA-N	CCMSLIB00005463562|CCMSLIB00004716754|CCMSLIB00000565493	0.68|0.5|0.51	6|6|4	4.1|3.01|2.04	0.0	0.0	0.0	0.0	0.0	4664126.674999995	0.0	0.0
52	187.26	47.16	282960.0	1.0	Azelaic acid|2-Methyl Gramine|"NEPSILON,NEPSILON,NEPSILON-TRIMETHYLLYSINE"	[M-H]-|[M-H]-|[M-H]-	O=C(O)CCCCCCCC(=O)O|Cc1[nH]c2ccccc2c1CN(C)C|C[N+](C)(C)CCCCC(N)C(=O)[O-]	InChI=1S/C9H16O4/c10-8(11)6-4-2-1-3-5-7-9(12)13/h1-7H2,(H,10,11)(H,12,13)|InChI=1S/C12H16N2/c1-9-11(8-14(2)3)10-6-4-5-7-12(10)13-9/h4-7,13H,8H2,1-3H3|InChI=1S/C9H20N2O2/c1-11(2,3)7-5-4-6-8(10)9(12)13/h8H,4-7,10H2,1-3H3	BDJRBEYXGGNYIS-UHFFFAOYSA-N|AJNMXMZCRHTBEH-UHFFFAOYSA-N|MXNRLFUSFKVQSK-UHFFFAOYSA-N	CCMSLIB00004691667|CCMSLIB00004693752|CCMSLIB00000578217	0.98|0.67|0.94	8|9|6	7.84|6.0|5.64	0.0	0.0	0.0	0.0	0.0	4702212.460000011	0.0	0.0
53	353.28	24.14	977000.0	1.0	CHLOROGENIC|Caffeoylquinic acid|Undulatoside A	[M-H]-|[M-H]-|[M-H]-	O=C(/C=C/c1ccc(O)c(O)c1)O[C@@H]1C[C@](O)(C(=O)O)C[C@@H](O)[C@H]1O|O=C(C=Cc1ccc(O)c(O)c1)OC1CC(O)(C(=O)O)CC(O)C1O|Cc1cc(=O)c2c(O)cc(O[C@@H]3O[C@H](CO)[C@@H](O)[C@H](O)[C@H]3O)cc2o1	InChI=1S/C16H18O9/c17-9-3-1-8(5-10(9)18)2-4-13(20)25-12-7-16(24,15(22)23)6-11(19)14(12)21/h1-5,11-12,14,17-19,21,24H,6-7H2,(H,22,23)/b4-2+/t11-,12-,14-,16+/m1/s1|InChI=1S/C16H18O9/c17-9-3-1-8(5-10(9)18)2-4-13(20)25-12-7-16(24,15(22)23)6-11(19)14(12)21/h1-5,11-12,14,17-19,21,24H,6-7H2,(H,22,23)|InChI=1S/C16H18O9/c1-6-2-8(18)12-9(19)3-7(4-10(12)23-6)24-16-15(22)14(21)13(20)11(5-17)25-16/h2-4,11,13-…	CWVRJTMFETXNAD-JUHZACGLSA-N|CWVRJTMFETXNAD-UHFFFAOYSA-N|BYYDEEAJCDGLER-YMILTQATSA-N	CCMSLIB00004702371|CCMSLIB00000579204|CCMSLIB00004702935	1.0|0.93|0.9	5|5|5	4.99|4.63|4.51	0.0	0.0	0.0	0.0	0.0	0.0	143247201.69499996	0.0
54	191.32	24.14	415207.0	1.0	(-)Quinic acid from|(1S,3R,4S,5R)-1,3,4,5-tetrahydroxycyclohexane-1-carboxylic acid|Quinic acid	[M-H]-|[M-H]-|[M-H]-	O=C(O)C1(O)C[C@@H](O)C(O)[C@H](O)C1|O=C(O)[C@]1(O)C[C@@H](O)[C@@H](O)[C@H](O)C1|O=C(O)[C@]1(O)C[C@@H](O)[C@H](O)[C@H](O)C1	InChI=1S/C7H12O6/c8-3-1-7(13,6(11)12)2-4(9)5(3)10/h3-5,8-10,13H,1-2H2,(H,11,12)/t3-,4-,5?,7?/m1/s1|InChI=1S/C7H12O6/c8-3-1-7(13,6(11)12)2-4(9)5(3)10/h3-5,8-10,13H,1-2H2,(H,11,12)/t3-,4-,5-,7+/m1/s1|InChI=1S/C7H12O6/c8-3-1-7(13,6(11)12)2-4(9)5(3)10/h3-5,8-10,13H,1-2H2,(H,11,12)/t3-,4-,5-,7-/m1/s1	AAWZDTNXLSGCEK-LNVDRNJUSA-N|AAWZDTNXLSGCEK-WYWMIBKRSA-N|AAWZDTNXLSGCEK-FNKGTGPASA-N	CCMSLIB00003134866|CCMSLIB00004697264|CCMSLIB00005729057	0.91|0.76|0.79	21|21|17	19.05|16.0|13.39	0.0	0.0	0.0	0.0	0.0	0.0	46787162.99499998	0.0
55	353.15	20.27	248731.0	1.0	(1S,3R,4S,5R)-4-{[(2E)-3-(3,4-dihydroxyphenyl)prop-2-enoyl]oxy}-1,3,5-trihydroxycyclohexane-1-carboxylic acid|(1r,3R,4s,5S)-4-{[(2E)-3-(3,4-Dihydroxyphenyl)-2-propenoyl]oxy}-1,3,5-trihydroxycyclohexanecarboxylic acid|Caffeoylquinic acid	[M-H]-|[M-H]-|[M-H]-	O=C(/C=C/c1ccc(O)c(O)c1)O[C@H]1[C@H](O)C[C@](O)(C(=O)O)C[C@H]1O|O=C(/C=C/c1ccc(O)c(O)c1)O[C@H]1[C@@H](O)C[C@](O)(C(=O)O)C[C@H]1O|O=C(C=Cc1ccc(O)c(O)c1)OC1CC(O)(C(=O)O)CC(O)C1O	InChI=1S/C16H18O9/c17-9-3-1-8(5-10(9)18)2-4-13(21)25-14-11(19)6-16(24,15(22)23)7-12(14)20/h1-5,11-12,14,17-20,24H,6-7H2,(H,22,23)/b4-2+/t11-,12-,14-,16+/m1/s1|InChI=1S/C16H18O9/c17-9-3-1-8(5-10(9)18)2-4-13(21)25-14-11(19)6-16(24,15(22)23)7-12(14)20/h1-5,11-12,14,17-20,24H,6-7H2,(H,22,23)/b4-2+/t11-,12+,14-,16+|InChI=1S/C16H18O9/c17-9-3-1-8(5-10(9)18)2-4-13(20)25-12-7-16(24,15(22)23)6-11(19)14(12)…	GYFFKZTYYAFCTR-JUHZACGLSA-N|GYFFKZTYYAFCTR-UCEFVAKBSA-N|CWVRJTMFETXNAD-UHFFFAOYSA-N	CCMSLIB00004715865|CCMSLIB00004701969|CCMSLIB00000579204	0.94|0.91|0.61	8|7|8	7.52|6.34|4.92	0.0	0.0	0.0	0.0	0.0	0.0	15410662.425000012	0.0
56	678.09	49.97	1550804.0	1.0										0.0	0.0	0.0	0.0	0.0	0.0	8238531.079999972	0.0
57	353.2	16.75	439711.0	1.0	(1S,3R,4S,5R)-4-{[(2E)-3-(3,4-dihydroxyphenyl)prop-2-enoyl]oxy}-1,3,5-trihydroxycyclohexane-1-carboxylic acid|(1r,3R,4s,5S)-4-{[(2E)-3-(3,4-Dihydroxyphenyl)-2-propenoyl]oxy}-1,3,5-trihydroxycyclohexanecarboxylic acid|Caffeoylquinic acid	[M-H]-|[M-H]-|[M-H]-	O=C(/C=C/c1ccc(O)c(O)c1)O[C@H]1[C@H](O)C[C@](O)(C(=O)O)C[C@H]1O|O=C(/C=C/c1ccc(O)c(O)c1)O[C@H]1[C@@H](O)C[C@](O)(C(=O)O)C[C@H]1O|O=C(C=Cc1ccc(O)c(O)c1)OC1CC(O)(C(=O)O)CC(O)C1O	InChI=1S/C16H18O9/c17-9-3-1-8(5-10(9)18)2-4-13(21)25-14-11(19)6-16(24,15(22)23)7-12(14)20/h1-5,11-12,14,17-20,24H,6-7H2,(H,22,23)/b4-2+/t11-,12-,14-,16+/m1/s1|InChI=1S/C16H18O9/c17-9-3-1-8(5-10(9)18)2-4-13(21)25-14-11(19)6-16(24,15(22)23)7-12(14)20/h1-5,11-12,14,17-20,24H,6-7H2,(H,22,23)/b4-2+/t11-,12+,14-,16+|InChI=1S/C16H18O9/c17-9-3-1-8(5-10(9)18)2-4-13(20)25-12-7-16(24,15(22)23)6-11(19)14(12)…	GYFFKZTYYAFCTR-JUHZACGLSA-N|GYFFKZTYYAFCTR-UCEFVAKBSA-N|CWVRJTMFETXNAD-UHFFFAOYSA-N	CCMSLIB00004715865|CCMSLIB00004701969|CCMSLIB00000579204	0.89|0.83|0.48	11|9|10	9.76|7.49|4.77	0.0	0.0	0.0	0.0	0.0	0.0	4950456.670000008	0.0
58	295.05	52.52	104870.0	1.0										0.0	0.0	0.0	0.0	0.0	0.0	8185029.159999961	0.0
59	819.79	49.4	3831515.0	1.0										0.0	0.0	0.0	0.0	0.0	0.0	0.0	22086956.754999995
60	1063.63	16.41	6920063.0	1.0										0.0	0.0	0.0	0.0	0.0	0.0	0.0	22923624.59
61	1122.9	51.65	758112.0	1.0										0.0	0.0	0.0	0.0	0.0	0.0	0.0	17916395.244999964
62	348.34	40.53	418602.0	1.0										0.0	0.0	0.0	0.0	0.0	0.0	0.0	25864211.595000114
63	477.15	43.46	1413900.0	1.0										0.0	0.0	0.0	0.0	0.0	0.0	0.0	16995586.505000032
64	756.79	49.34	1237503.0	1.0										0.0	0.0	0.0	0.0	0.0	0.0	0.0	14274175.05500015
65	394.15	40.47	2212504.0	1.0										0.0	0.0	0.0	0.0	0.0	0.0	0.0	16734321.785000065
66	1006.81	48.52	1247988.0	1.0										0.0	0.0	0.0	0.0	0.0	0.0	0.0	12874699.820000006
67	1098.76	50.58	1843646.0	1.0										0.0	0.0	0.0	0.0	0.0	0.0	0.0	14541144.679999953
68	1371.71	50.45	1233114.0	1.0										0.0	0.0	0.0	0.0	0.0	0.0	0.0	8438513.619999968
69	325.28	18.38	223060.0	1.0										0.0	0.0	0.0	0.0	0.0	0.0	0.0	9968969.37499996
70	849.64	16.35	2624704.0	1.0										0.0	0.0	0.0	0.0	0.0	0.0	0.0	10422057.399999993
71	269.42	43.46	60330.0	1.0	|Octadecanol|1H-Indene-4-carboxylic acid, octahydro-3a-hydroxy-3-(hydroxymethyl)-1,1,3,5-tetramethyl-	[M-H]-|[M-H]-|[M-H]-	C[C@]12CC[C@@H]3c4ccc(O)cc4CC[C@H]3[C@@H]1CCC2=O|CCCCCCCCCCCCCCCCCCO|CC1CCC2C(C)(C)CC(C)(CO)C2(O)C1C(=O)O	InChI=1S/C18H22O2/c1-18-9-8-14-13-5-3-12(19)10-11(13)2-4-15(14)16(18)6-7-17(18)20/h3,5,10,14-16,19H,2,4,6-9H2,1H3/t14-,15-,16+,18+/m1/s1|InChI=1S/C18H38O/c1-2-3-4-5-6-7-8-9-10-11-12-13-14-15-16-17-18-19/h19H,2-18H2,1H3|InChI=1S/C15H26O4/c1-9-5-6-10-13(2,3)7-14(4,8-16)15(10,19)11(9)12(17)18/h9-11,16,19H,5-8H2,1-4H3,(H,17,18)	DNXHEGUUPJUMQT-CBZIJGRNSA-N|GLDOVTGHNKAZLK-UHFFFAOYSA-N|CAKZQSFFOAEEET-UHFFFAOYSA-N	CCMSLIB00004694314|CCMSLIB00000426902|CCMSLIB00000851430	1.0|0.89|0.75	5|3|3	4.99|2.68|2.26	0.0	0.0	0.0	0.0	0.0	0.0	0.0	8070949.430000015
72	253.48	51.89	483440.0	1.0	palmitoleate (16:1(n-7))|cis-7-Hexadecenoic acid from|Palmitelaidic acid from	[M-H]-|[M-H]-|[M-H]-	CCCCCCC=CCCCCCCCC(=O)O|CCCCCCCC/C=C\CCCCCC(=O)O|CCCCCC/C=C/CCCCCCCC(=O)O	InChI=1S/C16H30O2/c1-2-3-4-5-6-7-8-9-10-11-12-13-14-15-16(17)18/h7-8H,2-6,9-15H2,1H3,(H,17,18)|InChI=1S/C16H30O2/c1-2-3-4-5-6-7-8-9-10-11-12-13-14-15-16(17)18/h9-10H,2-8,11-15H2,1H3,(H,17,18)/b10-9-|InChI=1S/C16H30O2/c1-2-3-4-5-6-7-8-9-10-11-12-13-14-15-16(17)18/h7-8H,2-6,9-15H2,1H3,(H,17,18)/b8-7+	SECPZKHBENQXJG-UHFFFAOYSA-N|PJHOFUXBXJNUAC-KTKRTIGZSA-N|SECPZKHBENQXJG-BQYQJAHWSA-N	CCMSLIB00005771049|CCMSLIB00003137780|CCMSLIB00003134498	0.96|0.98|0.86	4|3|3	3.83|2.95|2.58	0.0	0.0	0.0	0.0	0.0	0.0	0.0	4879883.5350000635
73	431.37	43.4	390630.0	1.0	apigetrin|Apigenin 7-O-glucopyranoside|genistin	[M-H]-|[M-H]-|[M-H]-	O=c1cc(-c2ccc(O)cc2)oc2cc(O[C@@H]3O[C@H](CO)[C@@H](O)[C@H](O)[C@H]3O)cc(O)c12|O=c1cc(-c2ccc(O)cc2)oc2cc(O[C@@H]3O[C@H](CO)[C@@H](O)[C@@H](O)[C@H]3O)cc(O)c12|O=c1c(-c2ccc(O)cc2)coc2cc(O[C@@H]3O[C@H](CO)[C@@H](O)[C@H](O)[C@H]3O)cc(O)c12	InChI=1S/C21H20O10/c22-8-16-18(26)19(27)20(28)21(31-16)29-11-5-12(24)17-13(25)7-14(30-15(17)6-11)9-1-3-10(23)4-2-9/h1-7,16,18-24,26-28H,8H2/t16-,18-,19+,20-,21-/m1/s1|InChI=1S/C21H20O10/c22-8-16-18(26)19(27)20(28)21(31-16)29-11-5-12(24)17-13(25)7-14(30-15(17)6-11)9-1-3-10(23)4-2-9/h1-7,16,18-24,26-28H,8H2/t16-,18-,19-,20-,21-/m1/s1|InChI=1S/C21H20O10/c22-7-15-18(26)19(27)20(28)21(31-15)30-11-5-13…	KMOUJOKENFFTPU-QNDFHXLGSA-N|KMOUJOKENFFTPU-GHRYLNIYSA-N|ZCOLJUOHXJRHDI-CMWLGVBASA-N	CCMSLIB00004704396|CCMSLIB00006126967|CCMSLIB00004704408	0.8|0.63|0.62	15|15|13	12.0|9.49|8.12	0.0	0.0	0.0	0.0	0.0	0.0	0.0	8114998.465000003
74	1094.63	23.85	652371.0	1.0										0.0	0.0	0.0	0.0	0.0	0.0	0.0	7713443.045000007
75	1502.84	49.72	755032.0	1.0										0.0	0.0	0.0	0.0	0.0	0.0	0.0	8496051.500000032
76	650.59	32.42	459860.0	1.0										0.0	0.0	0.0	0.0	0.0	0.0	0.0	8662176.284999996
77	461.14	31.75	506830.0	1.0	Isoflavone base + 2O, O-Hex	[M-H+HCOOH]-	O=c1c(-c2ccc(O)cc2)coc2cc(OC3OC(CO)C(O)C(O)C3O)ccc12	InChI=1S/C21H20O9/c22-8-16-18(25)19(26)20(27)21(30-16)29-12-5-6-13-15(7-12)28-9-14(17(13)24)10-1-3-11(23)4-2-10/h1-7,9,16,18-23,25-27H,8H2	KYQZWONCHDNPDP-UHFFFAOYSA-N	CCMSLIB00005743492	0.9	3	2.69	0.0	0.0	0.0	0.0	0.0	0.0	0.0	6519339.729999958
78	528.68	49.65	567300.0	1.0										0.0	0.0	0.0	0.0	0.0	0.0	0.0	4148465.2450000094
79	1092.4	15.56	599310.0	1.0										0.0	0.0	0.0	0.0	0.0	0.0	0.0	4347920.204999987
80	1077.65	47.52	440650.0	1.0										0.0	0.0	0.0	0.0	0.0	0.0	0.0	8083501.889999966
81	121.18	21.34	7500.0	1.0										0.0	0.0	0.0	0.0	0.0	0.0	0.0	4505137.705000008
82	144.22	39.59	53890.0	1.0	2-hydroxyquinoline|N-Methylisoleucine|Quinolin-4-ol	[M-H]-|[M-H]-|[M-H]-	Oc1ccc2ccccc2n1|CCC(C)C(NC)C(=O)O|Oc1ccnc2ccccc12	InChI=1S/C9H7NO/c11-9-6-5-7-3-1-2-4-8(7)10-9/h1-6H,(H,10,11)|InChI=1S/C7H15NO2/c1-4-5(2)6(8-3)7(9)10/h5-6,8H,4H2,1-3H3,(H,9,10)|InChI=1S/C9H7NO/c11-9-5-6-10-8-4-2-1-3-7(8)9/h1-6H,(H,10,11)	LISFMEBWQUVKPJ-UHFFFAOYSA-N|KSPIYJQBLVDRRI-UHFFFAOYSA-N|PMZDQRJGMBOQBF-UHFFFAOYSA-N	CCMSLIB00004691733|CCMSLIB00004693991|CCMSLIB00005729533	1.0|0.99|0.99	5|4|3	4.98|3.97|2.96	0.0	0.0	0.0	0.0	0.0	0.0	0.0	6015638.75499997
83	672.5	23.0	171960.0	1.0										0.0	0.0	0.0	0.0	0.0	0.0	0.0	5377953.024999993
84	494.47	37.65	319800.0	1.0										0.0	0.0	0.0	0.0	0.0	0.0	0.0	3717738.85
85	419.24	41.77	171280.0	1.0	isorhapontin|4-Deoxyphloridzin	[M-H]-|[M-H]-	COc1cc(/C=C/c2cc(O)cc(O[C@@H]3O[C@H](CO)[C@@H](O)[C@H](O)[C@H]3O)c2)ccc1O|O=C(CCc1ccccc1)c1c(O)cc(O)cc1OC1OC(CO)C(O)C(O)C1O	InChI=1S/C21H24O9/c1-28-16-8-11(4-5-15(16)24)2-3-12-6-13(23)9-14(7-12)29-21-20(27)19(26)18(25)17(10-22)30-21/h2-9,17-27H,10H2,1H3/b3-2+/t17-,18-,19+,20-,21-/m1/s1|InChI=1S/C21H24O9/c22-10-16-18(26)19(27)20(28)21(30-16)29-15-9-12(23)8-14(25)17(15)13(24)7-6-11-4-2-1-3-5-11/h1-5,8-9,16,18-23,25-28H,6-7,10H2	KLPUXMNQDCUPNO-DXKBKAGUSA-N|NLGUKXQDDTZCDG-UHFFFAOYSA-N	CCMSLIB00004696320|CCMSLIB00005742699	0.74|0.78	5|3	3.72|2.33	0.0	0.0	0.0	0.0	0.0	0.0	0.0	2533141.3449999867
86	202.24	25.53	203110.0	1.0	N6-(DELTA2-ISOPENTENYL)-ADENINE|L-TRYPTOPHANAMIDE|L-TRYPTOPHANAMIDE	[M-H]-|[M-H]-|[M-H]-	CC(C)=CCNc1ncnc2nc[nH]c12|NC(=O)[C@@H](N)Cc1c[nH]c2ccccc12|NC(=O)C(N)Cc1c[nH]c2ccccc12	InChI=1S/C10H13N5/c1-7(2)3-4-11-9-8-10(13-5-12-8)15-6-14-9/h3,5-6H,4H2,1-2H3,(H2,11,12,13,14,15)|InChI=1S/C11H13N3O/c12-9(11(13)15)5-7-6-14-10-4-2-1-3-8(7)10/h1-4,6,9,14H,5,12H2,(H2,13,15)/t9-/m0/s1|InChI=1S/C11H13N3O/c12-9(11(13)15)5-7-6-14-10-4-2-1-3-8(7)10/h1-4,6,9,14H,5,12H2,(H2,13,15)	HYVABZIGRDEKCD-UHFFFAOYSA-N|JLSKPBDKNIXMBS-VIFPVBQESA-N|JLSKPBDKNIXMBS-UHFFFAOYSA-N	CCMSLIB00000578323|CCMSLIB00000578310|CCMSLIB00005464468	0.92|0.7|0.59	5|3|3	4.62|2.09|1.78	0.0	0.0	0.0	0.0	0.0	0.0	0.0	1907314.825000008
