# Supplementary material for: An insight into an intriguing oxidative biotransformation pathway of 5-O-caffeoylquinic acid by a gut bacterium
Source: Royal Society of Chemistry journal article supplement (doi:10.1039/d1fo04304h), 2022-01-01
Supplement: d1fo04304h3.xlsx [file d1fo04304h3.xlsx]

## Sheet: CQA and CA by spectro and enzim
Table S2. List of ions and their peak height from 5-CQA and CA oxidized using electrochemical and enzymatic methods obtained after LC-MS/MS analysis followed by MzMine 2 treatement.
ID	m/z	Retention time (min)	5-CQA_2mM after 20 min of electrooxidation (at + 0.8 V)	CA_2mM_in Phosphate buffer pH 5.8	5-CA_2mM after 20 min of electrooxidation (at + 0.6 V)	CQA_2mM_in Phosphate buffer pH 5.8	CA after enzymatic oxidation	CA in 5 mM malate buffer	CQA in 5 mM malate buffer	CQA after enzymatic oxidation
1	705.249	30.62	26135056	0	0	686444	0	0	0	55560016
2	705.286	32.2	15899738	0	0	0	0	0	0	53446232
3	353.237	19.2356	12027914	0	0	62342336	198106	0	129352432	82102464
4	513.476	30.5825	11970652	0	0	0	0	0	0	29891552
5	513.42	32.2429	9411324	0	0	260471	0	0	0	29841000
6	705.365	44.8802	9093050	0	0	0	0	0	0	5796711
7	727.309	30.5595	9085744	0	0	0	0	0	0	22047680
8	707.154	19.2343	9032856	0	0	181005632	0	0	203937536	212937216
9	727.314	32.2099	7150538	0	0	0	0	0	0	24949736
10	729.205	19.2457	6620454	0	0	24790192	0	0	100353264	32408120
11	705.347	38.4001	5541530	0	0	0	0	0	0	7989493
12	339.431	30.5584	5355464	0	0	0	0	0	0	11769836
13	705.356	43.5108	5354327	0	0	0	0	0	0	5685009
14	191.298	19.2344	4711733	0	0	29732064	0	0	53338696	40644920
15	375.374	19.278	4614803	0	0	6844002	0	0	34142128	10789976
16	535.305	30.9637	4108625	0	0	0	0	0	204336	0
17	705.368	39.4569	3899207	0	0	0	0	0	0	7927445
18	339.425	32.2357	3014131	0	0	0	0	0	0	11587204
19	727.372	44.8802	3011877	0	0	0	0	0	0	2751371
20	535.436	32.1592	2930186	0	0	0	0	0	0	9782480
21	513.4	44.9689	2621339	0	0	0	256471	0	0	1725794
22	727.378	43.4543	2218939	0	0	0	0	0	0	2516651
23	727.389	39.488	1971869	0	0	0	0	0	0	4412497
24	727.352	38.4001	1907611	0	0	0	0	0	0	3614396
25	723.693	49.9847	1847617	0	0	0	0	0	0	0
26	705.348	16.3694	1805582	0	0	1119127	0	0	0	4302407
27	513.504	43.5108	1640115	0	0	0	0	0	0	1775690
28	705.27	34.9922	1546907	0	0	0	0	0	0	643766
29	513.457	38.5222	1457170	0	0	0	0	0	0	0
30	421.144	19.1929	1452684	0	0	1049158	0	0	1443683	1010831
31	705.292	26.3675	1432645	0	0	0	0	0	0	0
32	705.373	46.6946	1315016	0	0	0	0	0	0	1265052
33	321.438	30.6078	1243084	0	0	0	0	0	0	3299342
34	705.307	18.183	1015230	0	0	830994	0	0	271583	5571119
35	411.247	19.3122	981297	0	0	891376	0	0	3684765	1316171
36	513.427	34.9929	979101	0	0	0	0	0	0	328222
37	513.477	39.424	962865	0	0	0	0	0	0	1603071
38	1105.07	19.2904	913925	0	0	3304765	0	0	20845176	5261631
39	751.223	19.2763	911239	0	0	2034923	0	0	17989512	3039962
40	321.424	32.2099	886470	0	0	0	0	0	0	2253288
41	438.26	19.4444	837623	0	0	583907	0	0	4243251	1044976
42	727.292	34.9922	816496	0	0	0	0	0	0	324868
43	743.202	30.5572	814901	0	0	0	0	0	0	1738407
44	337.26	25.9677	805135	0	0	1302781	0	0	1568682	2185346
45	745.192	19.1735	777802	0	0	2473411	0	0	9630384	3209598
46	1073.3	15.6995	731477	0	0	0	0	0	0	0
47	727.375	16.3871	716973	0	0	0	0	0	0	2169855
48	795.071	32.1805	709538	0	0	0	0	0	0	1275858
49	743.203	32.2317	696420	0	0	0	0	0	0	1580035
50	705.411	12.084	681790	0	0	0	0	0	0	0
51	705.297	29.0198	672848	0	0	0	0	0	0	469025
52	419.283	49.0908	634670	0	0	0	0	0	0	0
53	1072.85	19.1613	628209	0	0	441027	0	0	0	1224636
54	795.041	30.6583	609362	0	0	0	0	0	0	1085163
55	352.883	38.3981	595272	0	0	0	0	0	0	785145
56	1411.43	30.5837	593582	0	0	0	0	0	0	2718395
57	352.804	44.9862	555655	0	0	0	0	0	0	339761
58	1073.31	16.5742	550723	0	0	0	0	0	0	0
59	1455.19	30.5584	539531	0	0	0	0	0	0	2278414
60	727.322	26.3675	538265	0	0	0	0	0	0	0
61	749.177	32.3365	519918	0	0	0	0	0	0	932605
62	335.514	45.0127	493685	0	0	0	0	0	0	2433828
63	551.407	30.5837	486708	0	0	0	0	0	0	1032672
64	1073.31	18.332	479359	0	0	0	0	0	0	0
65	1055.35	17.0523	478733	0	0	0	0	0	0	217917
66	339.426	45.0131	477535	0	0	0	0	0	0	255182
67	749.179	30.5342	474369	0	0	0	0	0	0	850748
68	1303.34	30.1245	463105	0	0	0	0	0	0	0
69	295.479	30.5595	452152	0	0	0	0	0	0	906686
70	536.59	15.6995	450534	0	0	0	0	0	0	0
71	391.256	19.2425	450272	0	0	1409061	0	0	3113785	1054621
72	513.478	46.6623	442431	0	0	0	0	0	0	253161
73	727.312	18.1825	441326	0	0	393340	0	0	240377	2698486
74	551.426	32.1832	432249	0	0	0	0	0	0	1208411
75	1433.23	30.5584	429144	0	0	0	0	0	0	2356988
76	727.38	46.6946	412642	0	0	0	0	0	0	550254
77	677.948	49.6897	410192	0	0	0	0	0	208078	0
78	1055.33	15.0461	409064	0	0	0	0	0	0	309053
79	651.875	30.1245	402308	0	0	0	0	0	0	0
80	723.464	45.039	401829	0	0	0	0	0	0	1656567
81	723.39	14.1572	400868	0	0	0	0	0	0	1920087
82	451.12	19.1731	397067	0	0	1206526	0	0	291752	0
83	836.681	10.9607	392882	0	0	0	0	0	0	0
84	1055.29	21.4713	387362	0	0	0	0	0	0	0
85	705.546	47.9894	378361	0	0	0	866218	0	0	832262
86	723.463	13.4213	377113	0	0	0	0	0	0	1961237
87	705.23	19.1396	376776	0	0	0	0	0	6108618	0
88	767.174	19.2929	375339	0	0	633978	0	0	4488458	1034290
89	339.433	35.2317	370654	0	0	0	0	0	0	0
90	651.875	36.019	367732	0	0	0	0	0	0	0
91	703.572	8.58083	367294	0	0	0	0	0	0	0
92	389.129	19.2892	361723	0	0	664003	0	0	0	595556
93	1411.36	12.084	356068	0	0	0	0	0	0	0
94	513.388	16.3694	354411	0	0	267615	0	0	0	589085
95	398.985	19.2212	352065	0	0	720604	0	0	1884238	894904
96	703.474	25.7204	350404	0	0	0	0	0	0	520656
97	785.029	32.2317	349963	0	0	0	0	0	0	628716
98	1407.19	30.7148	349158	0	0	0	0	0	0	0
99	1303.34	24.5993	343743	0	0	0	0	0	0	0
100	651.73	34.1437	337722	0	0	0	0	0	0	0
101	361.426	30.5837	337423	0	0	0	0	0	0	792586
102	191.317	44.9069	336481	0	0	0	0	0	0	221249
103	295.066	51.6711	335796	232728	264116	301108	0	0	220310	0
104	536.493	16.5742	331915	0	0	0	0	0	0	0
105	743.255	44.9062	325652	0	0	0	0	0	0	245046
106	1411.1	32.2357	320380	0	0	0	0	0	0	3430945
107	443.171	19.4113	316486	0	0	208240	0	0	1125938	683943
108	1477.2	30.5837	314446	0	0	0	0	0	0	1292969
109	375.415	45.0391	306157	0	0	0	0	0	0	221145
110	413.281	19.2985	305788	0	0	0	0	0	0	0
111	785.088	30.6332	305136	0	0	0	0	0	0	771539
112	536.555	19.087	304494	0	0	0	0	0	0	0
113	743.346	25.1453	304345	0	0	0	0	0	0	0
114	398.413	29.86	303282	0	0	0	0	0	0	0
115	339.426	38.4001	302966	0	0	0	0	0	0	501325
116	749.244	38.3981	300833	0	0	0	0	0	0	236910
117	703.702	26.91	294428	0	0	0	0	0	0	0
118	1089.18	23.5632	291522	0	0	0	0	0	0	0
119	535.461	35.1033	286825	0	0	0	0	0	0	0
120	535.473	44.9862	285183	0	0	0	0	0	0	223025
121	191.286	38.4001	284646	0	0	0	0	0	0	244097
122	339.416	39.488	283319	0	0	0	0	0	0	534278
123	513.521	26.3675	282308	0	0	0	0	0	0	0
124	497.429	40.5043	282280	0	0	0	0	0	0	0
125	433.215	19.4174	280974	0	0	0	0	0	2902025	339751
126	651.875	24.6698	279331	0	0	0	0	0	0	0
127	879.555	42.2357	273196	0	0	0	0	0	0	0
128	339.409	43.5108	270722	0	0	0	0	0	0	285332
129	595.477	29.988	269452	0	0	0	0	0	0	0
130	191.27	30.633	260587	0	0	0	0	0	0	564870
131	1099.08	19.2047	260302	0	0	1418828	0	0	5742916	0
132	863.091	30.71	258205	0	0	0	0	0	0	219684
133	1303.34	34.0103	256890	0	0	0	0	0	0	0
134	1319.28	48.3922	252085	0	0	0	0	0	0	0
135	1094.84	19.1122	249378	0	0	0	0	0	2005485	1061627
136	1055.1	48.8663	244375	0	0	0	0	0	0	0
137	749.264	45.0928	242311	0	0	0	0	0	0	274096
138	836.681	13.2802	240575	0	0	0	0	0	0	0
139	1127.14	19.2057	238930	0	0	1091857	0	0	11355612	1549765
140	1053.31	28.7232	237604	0	0	0	0	0	0	0
141	703.32	37.3503	236641	0	0	0	0	0	0	1700709
142	1095.31	15.761	236460	0	0	0	0	0	0	0
143	352.753	43.4543	232798	0	0	0	0	0	0	287233
144	1149.23	19.28	231398	0	0	0	0	0	2626586	0
145	375.395	38.3981	230401	0	0	0	0	0	0	366182
146	179.231	19.3028	227979	0	0	657999	0	0	2244138	704368
147	881.136	15.6995	226285	0	0	0	0	0	0	0
148	880.496	28.377	222290	0	0	0	0	0	0	0
149	795.136	44.9589	218497	0	0	0	0	0	0	166467
150	1055.29	18.9472	214558	0	0	0	0	0	0	0
151	773.179	19.3365	213357	0	0	581572	0	0	5669806	676726
152	743.222	39.4551	212859	0	0	0	0	0	0	387849
153	535.453	38.3981	212038	0	0	0	0	0	0	341767
154	295.428	32.2072	211997	0	0	0	0	0	0	891433
155	1057.33	38.7078	211514	0	0	0	0	0	0	0
156	1433.2	32.1832	209555	0	0	0	0	0	0	1834145
157	361.388	32.1592	208771	0	0	0	0	0	0	737077
158	1057.34	19.8133	206213	0	0	0	0	0	0	860132
159	725.228	30.7652	204034	0	0	0	0	0	0	0
160	535.453	43.4821	202706	0	0	0	0	0	0	249008
161	191.286	32.1592	200341	0	0	0	0	0	0	493045
162	416.122	19.3502	198636	0	0	0	0	0	0	602486
163	1455.19	32.2339	194456	0	0	0	0	0	0	1300941
164	161.232	19.244	192741	0	0	1072096	0	0	2589383	1864569
165	351.355	19.2347	192600	0	0	982254	0	0	2576116	843100
166	135.247	19.2203	191439	0	0	586423	0	0	2059904	831157
167	749.535	43.5108	191422	0	0	0	0	0	0	291978
168	191.294	25.9522	191417	0	0	0	0	0	465292	449686
169	339.408	16.3302	186348	0	0	0	0	0	0	299133
170	812.107	32.1093	183488	0	0	0	0	0	0	537804
171	716.458	12.084	180331	0	0	0	0	0	0	0
172	758.266	30.6135	179174	0	0	0	0	0	0	0
173	1053.31	27.9235	178524	0	0	0	0	0	0	0
174	191.298	43.5108	177353	0	0	0	0	0	0	137743
175	703.361	12.0176	175865	0	0	0	0	0	0	1104869
176	713.782	49.9263	174694	0	0	0	0	0	0	0
177	547.704	15.6995	172557	0	0	0	0	0	0	0
178	765.125	30.633	168025	0	0	0	0	0	0	289272
179	703.505	32.2635	166422	0	0	0	0	0	0	0
180	513.521	40.8795	165785	0	0	0	0	0	0	0
181	375.436	43.4543	164526	0	0	0	0	0	0	193739
182	1143.08	19.2584	160591	0	0	0	0	0	3145620	741067
183	880.707	32.4218	158669	0	0	0	0	0	0	0
184	813.552	30.5584	158652	0	0	0	0	0	0	319956
185	797.28	19.4025	156954	0	0	0	0	0	0	0
186	787.232	19.2985	156007	0	0	0	0	0	0	0
187	1471.26	30.5847	154917	0	0	0	0	0	0	872420
188	704.82	24.7375	152047	0	0	0	0	0	0	0
189	879.595	43.5123	148980	0	0	0	0	0	0	0
190	1449.15	30.6089	148681	0	0	0	0	0	0	305179
191	703.347	17.5655	141353	0	0	0	0	0	0	0
192	721.246	17.7678	139735	0	0	0	0	0	0	0
193	1486.44	30.6135	130292	0	0	0	0	0	0	0
194	870.909	30.6642	129417	0	0	0	0	0	0	0
195	802.921	32.3365	127581	0	0	0	0	0	0	494862
196	179.174	21.505	0	32188904	26330312	0	58378016	49035024	0	0
197	135.297	21.529	0	13497472	10082866	0	22149912	26217888	0	0
198	367.322	21.5166	0	5119983	2083513	0	25317304	6168895	0	0
199	358.938	21.5166	0	3582818	3074987	0	9022648	6345936	0	0
200	246.994	21.5291	0	959266	666677	0	1675414	1308518	0	0
201	214.942	21.4708	0	661462	667048	0	687993	2436181	0	0
202	179.184	23.5834	0	620572	522995	0	371061	0	0	0
203	383.264	21.4597	0	609098	504766	0	872070	2429284	0	0
204	412.212	21.5488	0	395122	367704	0	560109	739613	0	0
205	241.996	21.6545	0	310933	264788	0	0	774862	0	0
206	425.161	21.5715	0	295017	0	0	0	0	0	0
207	237.059	21.5062	0	210175	269034	0	0	1224903	0	0
208	216.945	21.5327	0	198832	238107	0	357120	0	0	0
209	604.941	21.5715	0	175443	0	0	0	0	0	0
210	314.904	21.4804	0	158835	0	0	361909	701558	0	0
211	469.125	21.5156	0	116140	0	0	0	507011	0	0
212	313.372	37.9701	0	0	5631737	0	5874316	0	0	0
213	313.325	46.6	0	0	1731640	0	1272047	0	0	0
214	313.329	50.4254	0	0	1324992	0	1108967	0	0	0
215	313.378	35.7182	0	0	1014427	0	0	0	0	0
216	313.343	49.4146	0	0	948390	0	528957	0	0	0
217	442.243	38.1107	0	0	945131	0	0	0	0	0
218	715.146	46.696	0	0	804588	0	0	0	0	0
219	425.263	46.6299	0	0	786081	0	451459	0	0	0
220	442.389	46.5726	0	0	762269	0	276680	0	0	0
221	335.408	50.4576	0	0	739571	0	349426	0	0	0
222	425.208	37.9402	0	0	716230	0	732714	0	0	0
223	415.249	46.5726	0	0	700430	0	465516	0	0	0
224	179.215	46.6299	0	0	699241	0	507951	0	0	0
225	269.499	37.9701	0	0	696898	0	528512	0	0	0
226	335.358	46.5726	0	0	691941	0	366512	0	0	0
227	335.434	35.6548	0	0	674267	0	0	0	0	0
228	135.316	46.6299	0	0	653968	0	354992	0	0	0
229	335.356	37.9402	0	0	626574	0	463625	0	0	0
230	425.23	50.396	0	0	611778	0	374063	0	0	0
231	359.097	46.6299	0	0	544934	0	382816	0	0	0
232	415.262	37.9701	0	0	544706	0	501734	0	0	0
233	737.207	50.4747	0	0	511814	0	0	0	0	0
234	442.243	50.4747	0	0	488192	0	0	0	0	0
235	393.237	46.6025	0	0	478028	0	302547	0	0	0
236	379.284	46.5726	0	0	444729	0	320385	0	0	0
237	177.206	20.2759	0	0	440639	0	855820	0	0	0
238	147.136	36.0552	0	0	425416	0	0	152322	225984	0
239	393.216	35.781	0	0	422467	0	0	0	0	0
240	425.296	35.781	0	0	388524	0	0	0	0	0
241	393.237	37.9402	0	0	387269	0	249166	0	0	0
242	379.313	35.781	0	0	383157	0	0	0	0	0
243	415.205	35.7182	0	0	347374	0	0	0	0	0
244	313.262	40.9488	0	0	323324	0	0	0	0	0
245	442.243	35.7182	0	0	304935	0	0	0	0	0
246	420.124	35.6548	0	0	245535	0	0	0	0	0
247	1082.9	19.2587	0	0	0	2941446	0	0	6201757	3654890
248	1060.75	19.213	0	0	0	2593126	0	0	5204103	4601530
249	133.174	19.2586	0	0	0	1169973	0	0	2162559	786095
250	1415.18	19.2268	0	0	0	1033590	0	0	1985190	1191827
251	353.203	24.1794	0	0	0	986343	0	0	643299	901939
252	353.187	20.2322	0	0	0	970451	0	0	0	0
253	127.007	19.2297	0	0	0	905337	0	0	1963903	1616078
254	1121	19.3492	0	0	0	786654	0	0	3866040	1434057
255	823.891	19.245	0	0	0	762529	0	0	0	0
256	1114.68	19.2291	0	0	0	730632	0	0	0	1110141
257	715.367	19.1794	0	0	0	728784	0	0	1478160	842333
258	917.355	19.2088	0	0	0	706642	0	0	1915705	0
259	567.301	19.224	0	0	0	678690	0	0	4078140	772265
260	1094.14	19.3843	0	0	0	643992	0	0	0	0
261	727.146	19.3361	0	0	0	557602	0	0	3496678	667104
262	761.032	19.1818	0	0	0	542501	0	0	1090720	0
263	1249.16	19.2342	0	0	0	534453	0	0	0	892007
264	907.135	19.256	0	0	0	468894	0	0	0	1508537
265	895.076	19.2592	0	0	0	417785	0	0	0	1435426
266	1459.06	19.178	0	0	0	416565	0	0	1361507	770050
267	1271.28	19.287	0	0	0	399631	0	0	1796974	320837
268	753.402	19.3407	0	0	0	361614	0	0	0	0
269	1481	19.3015	0	0	0	353982	0	0	3242970	500244
270	1144.56	19.4282	0	0	0	352297	0	0	0	0
271	756.503	19.3016	0	0	0	341173	0	0	0	326748
272	1101.34	19.2972	0	0	0	313321	0	0	0	0
273	1279.35	19.2238	0	0	0	302698	0	0	886680	406166
274	367.33	35.8618	0	0	0	282832	0	0	433923	340963
275	1153.11	19.2507	0	0	0	270305	0	0	579700	0
276	769.216	19.1937	0	0	0	269174	0	0	0	0
277	926.359	19.4282	0	0	0	262528	0	0	0	0
278	1500.11	19.2744	0	0	0	249388	0	0	1425504	0
279	789.15	19.1559	0	0	0	235556	0	0	3219352	0
280	157.482	19.3407	0	0	0	230723	0	0	0	0
281	403.247	49.0202	0	0	0	0	4176358	0	0	0
282	269.472	49.0202	0	0	0	0	3232787	0	0	0
283	159.32	49.0202	0	0	0	0	2171319	0	0	0
284	279.289	21.4816	0	0	0	0	2124538	799693	0	0
285	383.528	25.0392	0	0	0	0	2105872	0	0	2334619
286	427.512	28.8757	0	0	0	0	2104816	0	0	2305349
287	357.057	49.0693	0	0	0	0	2034953	194186	0	0
288	393.293	49.0202	0	0	0	0	1960141	0	0	0
289	515.626	38.0659	0	0	0	0	1949926	0	0	2672124
290	339.432	21.0983	0	0	0	0	1840037	0	0	1982405
291	471.528	33.6611	0	0	0	0	1798885	0	0	2172128
292	559.711	41.1251	0	0	0	0	1663613	0	0	2498346
293	295.408	17.0305	0	0	0	0	1582233	0	0	1603292
294	603.758	43.5388	0	0	0	0	1577899	0	0	2155740
295	161.291	21.5551	0	0	0	0	1477285	317002	0	0
296	451.329	25.0103	0	0	0	0	1463833	0	0	1246983
297	407.314	21.0987	0	0	0	0	1290140	0	0	1149091
298	495.328	28.9049	0	0	0	0	1280505	0	0	1460831
299	322.875	21.4816	0	0	0	0	1262795	342315	0	0
300	749.767	48.8045	0	0	0	0	1231074	0	0	1054225
301	647.758	45.5659	0	0	0	0	1213687	0	0	1585197
302	793.801	49.3929	0	0	0	0	1164732	0	0	1188673
303	251.344	13.1688	0	0	0	0	1138032	0	0	1029040
304	291.456	49.0202	0	0	0	0	1124664	0	0	0
305	363.254	17.0569	0	0	0	0	1095968	0	0	1063696
306	627.45	41.1251	0	0	0	0	1068856	0	0	1369741
307	583.39	38.0383	0	0	0	0	1038982	0	0	1691573
308	1628.89	37.8295	0	0	0	0	1033906	0	0	0
309	671.505	43.5652	0	0	0	0	1019914	0	0	1142206
310	539.336	33.6321	0	0	0	0	1004694	0	0	1222808
311	137.176	15.1708	0	0	0	0	914980	0	0	0
312	837.842	49.8453	0	0	0	0	879249	0	0	1017284
313	715.175	49.0202	0	0	0	0	863603	0	0	0
314	691.819	47.2547	0	0	0	0	846141	0	0	1056473
315	881.929	50.1703	0	0	0	0	838285	0	0	968028
316	319.235	13.1688	0	0	0	0	815935	0	0	721230
317	379.255	49.0202	0	0	0	0	810577	0	0	0
318	715.49	45.5659	0	0	0	0	768109	0	0	916274
319	925.804	50.4945	0	0	0	0	752580	0	0	744177
320	759.563	47.2547	0	0	0	0	660489	0	0	701684
321	735.836	48.3601	0	0	0	0	630708	0	0	781545
322	661.677	46.3197	0	0	0	0	612430	0	0	640407
323	353.082	21.974	0	0	0	0	600724	273723	0	547168
324	420.233	49.0202	0	0	0	0	580781	0	0	0
325	425.19	48.9707	0	0	0	0	563665	0	0	0
326	485.408	28.9074	0	0	0	0	563014	0	0	569792
327	441.392	25.0392	0	0	0	0	556802	0	0	508459
328	617.559	44.2834	0	0	0	0	555502	0	0	550629
329	617.498	41.0722	0	0	0	0	553279	0	0	613658
330	415.364	50.3762	0	0	0	0	543666	0	0	0
331	969.789	50.7265	0	0	0	0	538712	0	0	499891
332	309.317	17.9329	0	0	0	0	526828	0	0	349447
333	353.289	17.0569	0	0	0	0	495292	0	0	466732
334	397.376	21.0723	0	0	0	0	494280	0	0	562492
335	415.292	49.0202	0	0	0	0	484747	0	0	0
336	529.431	33.6321	0	0	0	0	475207	0	0	533767
337	275.166	9.90742	0	0	0	0	471077	0	0	398296
338	207.223	9.939	0	0	0	0	460762	0	0	454138
339	491.206	45.0928	0	0	0	0	442464	0	0	0
340	397.401	26.0365	0	0	0	0	439457	0	233703	558698
341	573.439	38.0642	0	0	0	0	435914	0	0	690572
342	779.727	49.0434	0	0	0	0	432232	0	0	533804
343	179.233	50.3762	0	0	0	0	420018	0	0	0
344	403.349	45.1592	0	0	0	0	413692	0	0	0
345	573.474	41.8516	0	0	0	0	413032	0	0	446042
346	803.539	48.4183	0	0	0	0	408550	0	0	433250
347	441.373	30.3715	0	0	0	0	398689	0	0	497755
348	1623.34	41.2647	0	0	0	0	386389	0	0	0
349	705.552	45.5543	0	0	0	0	371021	0	0	0
350	359.263	50.3762	0	0	0	0	369864	0	0	0
351	265.276	13.8406	0	0	0	0	367471	0	0	355351
352	1363.64	37.7108	0	0	0	0	365455	0	0	0
353	135.246	50.3762	0	0	0	0	345105	0	0	0
354	109.134	49.0202	0	0	0	0	344179	0	0	0
355	661.588	43.5388	0	0	0	0	341158	0	0	470145
356	485.436	35.5177	0	0	0	0	301201	0	0	343284
357	736.904	37.7625	0	0	0	0	296759	0	0	0
358	253.347	21.5448	0	0	0	0	294799	0	0	0
359	905.656	49.851	0	0	0	0	277126	0	0	0
360	875.346	21.457	0	0	0	0	264899	0	0	0
361	1444.11	21.5015	0	0	0	0	262559	0	0	0
362	1685.44	37.4622	0	0	0	0	259564	0	0	0
363	309.312	13.1688	0	0	0	0	249791	0	0	298852
364	749.604	47.2829	0	0	0	0	247141	0	0	314982
365	447.221	45.0293	0	0	0	0	244165	0	0	0
366	487.387	28.8783	0	0	0	0	243105	0	0	0
367	737.196	46.504	0	0	0	0	239287	0	0	0
368	485.409	34.6392	0	0	0	0	233989	0	0	207382
369	793.595	48.3896	0	0	0	0	227179	0	0	232623
370	861.531	49.3923	0	0	0	0	223028	0	0	0
371	847.542	49.1045	0	0	0	0	221810	0	0	467944
372	1223.19	21.4125	0	0	0	0	221451	0	0	0
373	1020.97	21.5015	0	0	0	0	220344	0	0	0
374	1515.56	40.7642	0	0	0	0	217658	0	0	0
375	546.842	21.5015	0	0	0	0	216079	0	0	0
376	1548.98	37.1187	0	0	0	0	215023	0	0	0
377	671.302	49.0202	0	0	0	0	213147	0	0	0
378	798.949	21.5882	0	0	0	0	210089	0	0	0
379	817.417	48.8075	0	0	0	0	206644	0	0	0
380	209.334	43.7142	0	0	0	0	206263	0	0	335993
381	417.175	49.0202	0	0	0	0	204488	0	0	0
382	441.357	29.3321	0	0	0	0	193674	0	0	180804
383	463.307	28.8757	0	0	0	0	189206	0	0	167612
384	740.956	21.5448	0	0	0	0	187280	0	0	0
385	671.353	21.5716	0	0	0	0	184500	487478	0	0
386	147.135	49.2656	0	0	0	0	177666	156527	150634	0
387	1926.83	38.649	0	0	0	0	177077	0	0	0
388	355.264	17.0305	0	0	0	0	175409	0	0	183951
389	417.25	37.7625	0	0	0	0	174494	0	0	0
390	619.471	41.0988	0	0	0	0	172422	0	0	274680
391	399.265	21.0432	0	0	0	0	166976	0	0	188296
392	179.129	22.622	0	0	0	0	165128	0	0	0
393	595.268	41.093	0	0	0	0	164828	0	0	0
394	1129.67	21.367	0	0	0	0	164347	0	0	0
395	465.22	21.8055	0	0	0	0	152739	0	0	0
396	682.703	21.5882	0	0	0	0	149903	0	0	0
397	1614.72	38.8503	0	0	0	0	134780	0	0	0
398	1655.13	37.1187	0	0	0	0	130036	0	0	0
399	531.417	33.7266	0	0	0	0	127732	0	0	208389
400	507.19	33.6623	0	0	0	0	124545	0	0	0
401	419.194	24.9857	0	0	0	0	122112	0	0	0
402	417.292	46.4492	0	0	0	0	118737	0	0	0
403	683.234	45.6663	0	0	0	0	115993	0	0	0
404	356.807	21.6017	0	0	0	0	0	1145115	0	0
405	699.556	21.6017	0	0	0	0	0	925964	0	0
406	405.137	21.4617	0	0	0	0	0	862795	0	0
407	784.095	21.6017	0	0	0	0	0	831896	0	0
408	295.238	21.4167	0	0	0	0	0	821041	0	0
409	922.802	21.4617	0	0	0	0	0	756981	0	0
410	307.013	21.5062	0	0	0	0	0	713651	0	0
411	652.052	21.6017	0	0	0	0	0	646347	0	0
412	840.643	21.3628	0	0	0	0	0	633205	0	184968
413	715.946	21.555	0	0	0	0	0	631971	0	0
414	762.973	21.5062	0	0	0	0	0	631434	0	0
415	935.397	21.4617	0	0	0	0	0	627838	0	0
416	422.954	21.555	0	0	0	0	0	625410	0	0
417	702.679	21.4167	0	0	0	0	0	622860	0	0
418	1046.6	21.6532	0	0	0	0	0	620720	0	0
419	664.479	21.4617	0	0	0	0	0	617028	0	0
420	639.279	21.4167	0	0	0	0	0	602631	0	0
421	117.052	21.4617	0	0	0	0	0	600782	0	0
422	1124.13	21.555	0	0	0	0	0	597359	0	0
423	713.776	21.6017	0	0	0	0	0	597109	0	0
424	658.042	21.5062	0	0	0	0	0	582162	0	0
425	892.99	21.5062	0	0	0	0	0	578820	0	0
426	856.134	21.4617	0	0	0	0	0	578240	0	0
427	802.95	21.4167	0	0	0	0	0	573786	0	0
428	337.203	21.4167	0	0	0	0	0	571708	0	0
429	648.938	21.4617	0	0	0	0	0	570025	0	0
430	932.216	21.555	0	0	0	0	0	568170	0	0
431	941.029	21.5062	0	0	0	0	0	568152	0	0
432	743.131	21.555	0	0	0	0	0	568002	0	0
433	528.721	21.555	0	0	0	0	0	555989	0	0
434	862.959	21.5062	0	0	0	0	0	554261	0	0
435	880.826	21.4617	0	0	0	0	0	550860	0	0
436	293.029	21.6532	0	0	0	0	0	541807	0	0
437	159.115	21.5062	0	0	0	0	0	541388	0	0
438	177.023	21.5062	0	0	0	0	0	536894	0	0
439	583.269	21.4167	0	0	0	0	0	532454	0	0
440	868.015	21.555	0	0	0	0	0	526949	0	0
441	660.77	21.4167	0	0	0	0	0	526753	0	0
442	787.191	21.5062	0	0	0	0	0	525850	0	0
443	576.833	21.5062	0	0	0	0	0	518909	0	0
444	677.716	21.5062	0	0	0	0	0	516294	0	0
445	746.742	21.4167	0	0	0	0	0	510203	0	0
446	426.449	21.4617	0	0	0	0	0	504618	0	0
447	1714.5	21.555	0	0	0	0	0	497144	0	0
448	748.789	21.5062	0	0	0	0	0	486507	0	0
449	654.853	21.5062	0	0	0	0	0	485880	0	0
450	644.511	21.5062	0	0	0	0	0	481228	0	0
451	852.771	21.7062	0	0	0	0	0	473689	0	0
452	861.059	21.4686	0	0	0	0	0	473476	0	153484
453	1073.99	21.6017	0	0	0	0	0	473087	0	0
454	824.667	21.5062	0	0	0	0	0	469843	0	0
455	986.097	21.6017	0	0	0	0	0	469664	0	0
456	339.308	21.7561	0	0	0	0	0	469410	0	198839
457	822.745	21.5062	0	0	0	0	0	469056	0	0
458	873.79	21.5062	0	0	0	0	0	468063	0	0
459	947.898	21.4167	0	0	0	0	0	464716	0	0
460	313.066	21.5062	0	0	0	0	0	459412	0	0
461	631.691	21.7062	0	0	0	0	0	456012	0	0
462	833.86	21.4167	0	0	0	0	0	455964	0	0
463	1226.53	21.6017	0	0	0	0	0	446184	0	0
464	608.059	21.4617	0	0	0	0	0	445004	0	0
465	590.981	21.555	0	0	0	0	0	444542	0	0
466	876.789	21.5062	0	0	0	0	0	440722	0	0
467	903.157	21.4617	0	0	0	0	0	434684	0	0
468	723.616	49.4107	0	0	0	0	0	433014	873804	0
469	806.169	21.6017	0	0	0	0	0	429103	0	0
470	1424.21	21.555	0	0	0	0	0	427911	0	0
471	800.071	21.6532	0	0	0	0	0	427048	0	0
472	463.069	21.555	0	0	0	0	0	425798	0	0
473	722.698	21.5062	0	0	0	0	0	424209	0	0
474	554.197	21.4617	0	0	0	0	0	423381	0	0
475	370.954	21.555	0	0	0	0	0	423230	0	0
476	574.87	21.4617	0	0	0	0	0	422050	0	0
477	918.944	21.6017	0	0	0	0	0	418905	0	0
478	1023.04	21.6532	0	0	0	0	0	417149	0	0
479	234.935	21.4617	0	0	0	0	0	416853	0	0
480	773.059	21.5062	0	0	0	0	0	410421	0	0
481	674.673	21.4167	0	0	0	0	0	404443	0	0
482	737.749	21.4617	0	0	0	0	0	401265	0	0
483	781.851	21.5062	0	0	0	0	0	398736	0	0
484	435.289	21.5062	0	0	0	0	0	392695	0	0
485	445.471	21.555	0	0	0	0	0	390330	0	0
486	1091.33	21.4617	0	0	0	0	0	389130	0	0
487	956.769	21.6017	0	0	0	0	0	387113	0	0
488	828.764	21.6017	0	0	0	0	0	385812	0	0
489	1114.4	21.6532	0	0	0	0	0	380267	0	0
490	964.03	21.555	0	0	0	0	0	377724	0	0
491	1036.33	21.5062	0	0	0	0	0	371790	0	0
492	269.046	21.4617	0	0	0	0	0	371230	0	0
493	263.012	21.4617	0	0	0	0	0	367925	0	0
495	447.451	21.4617	0	0	0	0	0	361016	0	0
496	533.835	21.4617	0	0	0	0	0	358466	0	0
497	239.105	21.5062	0	0	0	0	0	356876	0	0
498	621.846	21.7062	0	0	0	0	0	356029	0	0
499	450.899	21.6017	0	0	0	0	0	354716	0	0
500	1108.82	21.6017	0	0	0	0	0	354471	0	0
501	910.92	21.4617	0	0	0	0	0	353262	0	0
502	1060.68	21.4617	0	0	0	0	0	352709	0	0
503	906.485	21.4617	0	0	0	0	0	348534	0	0
504	514.848	21.4617	0	0	0	0	0	348061	0	0
505	267.182	52.1815	0	0	0	0	0	346702	0	0
506	734.787	21.555	0	0	0	0	0	346246	0	0
507	508.77	21.555	0	0	0	0	0	345965	0	0
508	560.101	21.6017	0	0	0	0	0	338411	0	0
509	634.811	21.555	0	0	0	0	0	334450	0	0
510	836.135	21.5062	0	0	0	0	0	332100	0	0
511	282.886	21.6017	0	0	0	0	0	331297	0	0
512	725.046	21.4167	0	0	0	0	0	329360	0	0
513	120.034	45.766	0	0	0	0	0	329331	245364	0
514	327.215	52.3103	0	0	0	0	0	328175	0	0
515	628.307	21.7062	0	0	0	0	0	326822	0	0
516	814.65	21.6017	0	0	0	0	0	325346	0	0
517	380.746	21.555	0	0	0	0	0	324479	0	0
518	375.063	21.4617	0	0	0	0	0	322277	0	0
519	759.523	21.4617	0	0	0	0	0	320073	0	0
520	708.143	21.5062	0	0	0	0	0	319563	0	0
521	304.804	21.4617	0	0	0	0	0	317513	0	0
522	377.116	21.555	0	0	0	0	0	311131	0	0
523	1367.88	21.4617	0	0	0	0	0	309540	0	0
524	666.707	21.4617	0	0	0	0	0	304652	0	0
525	731.076	21.7062	0	0	0	0	0	303428	0	0
526	883.38	21.8873	0	0	0	0	0	302398	0	175463
527	952.524	21.4617	0	0	0	0	0	299346	0	0
528	1153.6	21.5062	0	0	0	0	0	286556	0	0
529	1306.07	52.5172	0	0	0	0	0	286458	337642	0
530	224.692	21.555	0	0	0	0	0	286167	0	0
531	538.014	21.555	0	0	0	0	0	285204	0	0
532	302.671	21.555	0	0	0	0	0	284371	0	0
533	179.145	24.145	0	0	0	0	0	281944	0	0
534	976.604	21.7062	0	0	0	0	0	281128	0	0
535	895.148	21.6017	0	0	0	0	0	280643	0	0
536	1451.99	21.4617	0	0	0	0	0	276540	0	0
537	324.754	21.4167	0	0	0	0	0	272903	0	0
538	1198.5	44.5502	0	0	0	0	0	271484	0	0
539	792.391	21.4617	0	0	0	0	0	268951	0	0
540	442.738	21.555	0	0	0	0	0	268783	0	0
541	1187.88	21.555	0	0	0	0	0	267089	0	0
542	483.094	21.5062	0	0	0	0	0	260886	0	0
543	520.847	21.371	0	0	0	0	0	260087	0	0
544	1106.29	21.6532	0	0	0	0	0	258020	0	0
545	267.148	21.5062	0	0	0	0	0	256657	0	0
546	562.015	21.5062	0	0	0	0	0	254447	0	0
547	1639.13	21.555	0	0	0	0	0	252925	0	0
548	778.64	21.4617	0	0	0	0	0	251879	0	0
549	120.034	38.0987	0	0	0	0	0	251113	207813	0
550	596.839	21.4617	0	0	0	0	0	246280	0	0
551	267.148	49.4283	0	0	0	0	0	246163	0	0
552	1306.14	21.371	0	0	0	0	0	244343	0	0
553	120.039	15.505	0	0	0	0	0	240397	149362	0
554	720.718	21.371	0	0	0	0	0	240157	0	0
555	1406.11	51.4778	0	0	0	0	0	239949	0	0
556	510.75	21.6017	0	0	0	0	0	238032	0	0
557	147.049	48.3033	0	0	0	0	0	236540	0	0
558	1006.48	21.371	0	0	0	0	0	235553	0	0
559	1239.23	21.555	0	0	0	0	0	231893	0	0
560	556.651	21.5062	0	0	0	0	0	231491	0	0
561	281.062	24.2058	0	0	0	0	0	230937	0	0
562	636.713	21.5062	0	0	0	0	0	229757	0	0
563	1505.98	52.4942	0	0	0	0	0	228916	0	0
564	1206.15	51.8218	0	0	0	0	0	226875	233352	0
565	271.158	21.6017	0	0	0	0	0	225912	0	0
566	692.82	21.6017	0	0	0	0	0	224143	0	0
567	120.06	50.3892	0	0	0	0	0	222538	144604	0
568	355.208	26.1	0	0	0	0	0	218541	0	0
569	355.167	30.9649	0	0	0	0	0	216789	182330	0
570	147.066	44.3761	0	0	0	0	0	216030	135370	0
571	980.913	21.4617	0	0	0	0	0	216000	0	0
572	355.108	45.4247	0	0	0	0	0	215966	184082	0
573	371.296	52.3886	0	0	0	0	0	215382	181069	0
574	120.045	18.6752	0	0	0	0	0	214697	0	0
575	120.045	26.4132	0	0	0	0	0	214145	0	0
576	329.197	52.547	0	0	0	0	0	212152	0	0
577	120.021	52.4232	0	0	0	0	0	212073	186748	0
578	355.167	36.635	0	0	0	0	0	209821	180041	0
579	147.109	50.6863	0	0	0	0	0	204475	0	0
580	120.034	44.7285	0	0	0	0	0	203311	224527	0
581	355.165	35.684	0	0	0	0	0	202673	183210	0
582	147.028	8.89617	0	0	0	0	0	200915	0	0
583	120.045	28.5017	0	0	0	0	0	200418	0	0
584	120.045	16.8997	0	0	0	0	0	199434	0	0
585	120.027	8.9365	0	0	0	0	0	199104	201898	0
586	147.112	34.9023	0	0	0	0	0	194942	193660	0
587	1516.89	21.4167	0	0	0	0	0	194688	0	0
588	278.981	34.8858	0	0	0	0	0	194379	0	0
589	120.045	10.6832	0	0	0	0	0	191038	0	0
590	298.946	21.7605	0	0	0	0	0	190321	0	0
591	146.991	41.8222	0	0	0	0	0	189294	0	0
592	120.08	46.8542	0	0	0	0	0	189217	0	0
593	311.232	49.4283	0	0	0	0	0	187955	0	0
594	120.054	12.7675	0	0	0	0	0	185742	0	0
595	146.992	34.0733	0	0	0	0	0	185309	0	0
596	386.424	21.6532	0	0	0	0	0	182422	0	0
597	697.436	21.4167	0	0	0	0	0	181765	0	0
598	355.208	41.3162	0	0	0	0	0	181324	0	0
599	147.048	31.1857	0	0	0	0	0	178380	156959	0
600	1912.94	21.5062	0	0	0	0	0	178000	0	0
601	120.034	19.9764	0	0	0	0	0	176890	187037	0
602	1613.3	21.6017	0	0	0	0	0	176411	0	0
603	146.991	22.0628	0	0	0	0	0	176334	0	0
604	147.058	39.3723	0	0	0	0	0	174061	141610	0
605	147.048	17.2793	0	0	0	0	0	171580	0	0
606	1106.22	51.5455	0	0	0	0	0	171049	0	0
607	147.066	18.5128	0	0	0	0	0	170852	178692	0
608	147.051	47.231	0	0	0	0	0	168854	0	0
609	281.097	33.9366	0	0	0	0	0	167952	197038	0
610	327.108	21.7062	0	0	0	0	0	167750	0	0
611	147.052	38.1644	0	0	0	0	0	167174	174127	0
612	120.045	36.0885	0	0	0	0	0	163168	0	0
613	147.01	20.468	0	0	0	0	0	163005	0	0
614	281.066	32.9853	0	0	0	0	0	161195	0	0
615	147.064	27.5447	0	0	0	0	0	160557	0	0
616	1546.03	21.5062	0	0	0	0	0	160344	0	0
617	147.033	30.6492	0	0	0	0	0	160130	0	0
618	120.045	9.7195	0	0	0	0	0	159882	0	0
619	281.096	23.2657	0	0	0	0	0	159591	0	0
620	356.279	50.7482	0	0	0	0	0	159480	0	0
621	327.215	51.1667	0	0	0	0	0	157822	0	0
622	355.12	42.7545	0	0	0	0	0	154809	169772	0
623	348.727	21.7062	0	0	0	0	0	153588	0	0
624	355.208	24.6993	0	0	0	0	0	152721	0	0
625	429.078	50.8683	0	0	0	0	0	150194	0	0
626	147.048	15.3472	0	0	0	0	0	146728	146725	0
627	147.063	14.1703	0	0	0	0	0	145541	147183	0
628	355.143	26.722	0	0	0	0	0	144649	0	0
629	371.014	51.1667	0	0	0	0	0	143393	0	0
630	147.068	40.4885	0	0	0	0	0	141462	237634	0
631	268.921	12.3922	0	0	0	0	0	139668	0	0
632	147.014	32.3668	0	0	0	0	0	139528	0	0
633	355.208	29.3315	0	0	0	0	0	137608	0	0
634	146.995	16.2098	0	0	0	0	0	133371	0	0
635	146.991	9.78767	0	0	0	0	0	131196	0	0
636	1433.8	21.555	0	0	0	0	0	130836	0	0
637	1006.3	50.983	0	0	0	0	0	121470	0	0
638	268.954	50.7482	0	0	0	0	0	120649	0	0
639	556.651	20.7855	0	0	0	0	0	117572	0	0
640	327.097	50.6257	0	0	0	0	0	116757	0	0
641	281.062	16.6515	0	0	0	0	0	113919	0	0
642	438.201	18.9758	0	0	0	0	0	0	2874305	859600
643	411.14	18.8338	0	0	0	0	0	0	2790135	0
644	1503.64	19.3317	0	0	0	0	0	0	2675698	641601
645	1108.87	18.9783	0	0	0	0	0	0	2618436	0
646	1548.58	19.077	0	0	0	0	0	0	2567989	0
647	1525.38	19.3317	0	0	0	0	0	0	2456801	150438
648	1483.71	19.027	0	0	0	0	0	0	2424912	0
649	1159.11	19.1698	0	0	0	0	0	0	2402541	0
650	1769.49	19.1492	0	0	0	0	0	0	2396038	758410
651	738.576	19.027	0	0	0	0	0	0	2281402	0
652	1467.38	19.1698	0	0	0	0	0	0	2266425	0
653	906.016	19.077	0	0	0	0	0	0	2252368	0
654	1171.26	19.2615	0	0	0	0	0	0	2238179	0
655	939.621	18.9783	0	0	0	0	0	0	2222439	0
656	1293.47	18.9783	0	0	0	0	0	0	2214325	0
657	589.199	19.077	0	0	0	0	0	0	2145229	0
658	1116.16	19.1207	0	0	0	0	0	0	2119394	0
659	433.094	18.8338	0	0	0	0	0	0	2043646	0
660	925.275	18.929	0	0	0	0	0	0	1997721	0
661	201.151	19.2177	0	0	0	0	0	0	1995124	516398
662	1155.93	19.027	0	0	0	0	0	0	1898520	0
663	936.458	18.9783	0	0	0	0	0	0	1709191	0
664	1859.03	18.9783	0	0	0	0	0	0	1664736	0
665	1063.28	18.9783	0	0	0	0	0	0	1620932	0
666	1165.27	19.3077	0	0	0	0	0	0	1590948	0
667	583.208	19.2615	0	0	0	0	0	0	1563316	0
668	1812.9	19.027	0	0	0	0	0	0	1548771	0
669	1304.34	19.2137	0	0	0	0	0	0	1493351	0
670	928.24	18.929	0	0	0	0	0	0	1468859	0
671	460.144	19.4752	0	0	0	0	0	0	1424696	185909
672	1186.96	19.3077	0	0	0	0	0	0	1421881	0
673	915.144	19.027	0	0	0	0	0	0	1410022	0
674	1195.14	19.2615	0	0	0	0	0	0	1372599	0
675	1563.86	19.2137	0	0	0	0	0	0	1367430	0
676	1357.09	19.1698	0	0	0	0	0	0	1360943	0
677	909.819	18.9783	0	0	0	0	0	0	1357795	0
678	473.025	18.8805	0	0	0	0	0	0	1346717	0
679	803.538	19.3077	0	0	0	0	0	0	1342804	0
680	1312.31	19.1698	0	0	0	0	0	0	1311329	0
681	1519.66	19.3587	0	0	0	0	0	0	1308098	221333
682	1181.12	19.077	0	0	0	0	0	0	1295114	0
683	1138.04	19.2664	0	0	0	0	0	0	1273694	481245
684	814.013	19.403	0	0	0	0	0	0	1271304	366792
685	1699.83	19.2137	0	0	0	0	0	0	1264829	0
686	1913.81	18.929	0	0	0	0	0	0	1250530	0
687	660.531	19.2137	0	0	0	0	0	0	1249513	0
688	770.948	19.1698	0	0	0	0	0	0	1222235	0
689	1489.26	18.929	0	0	0	0	0	0	1213493	0
690	171.147	19.1491	0	0	0	0	0	0	1191603	669034
691	1475.84	19.027	0	0	0	0	0	0	1180165	0
692	1436.93	19.1248	0	0	0	0	0	0	1178279	1257924
693	791.28	18.8805	0	0	0	0	0	0	1138497	0
694	955.703	19.1207	0	0	0	0	0	0	1099213	0
695	848.849	18.9783	0	0	0	0	0	0	1092160	0
696	407.33	18.9783	0	0	0	0	0	0	1079941	0
697	1086.24	19.2852	0	0	0	0	0	0	1072028	302742
698	811.23	19.2137	0	0	0	0	0	0	1055428	0
699	1203.23	19.2137	0	0	0	0	0	0	1049741	0
700	1713.17	19.2137	0	0	0	0	0	0	1023781	0
701	403.496	19.077	0	0	0	0	0	0	1005752	0
702	1347.64	19.3077	0	0	0	0	0	0	1004914	0
703	375.35	24.1872	0	0	0	0	0	0	1004537	499133
704	1132.67	19.2137	0	0	0	0	0	0	993776	0
705	893.105	18.8805	0	0	0	0	0	0	990510	0
706	1512.62	19.3077	0	0	0	0	0	0	919841	0
707	1872.72	19.1698	0	0	0	0	0	0	916636	0
708	565.062	19.077	0	0	0	0	0	0	905241	0
709	1219.59	19.2137	0	0	0	0	0	0	902590	0
710	809.265	19.2615	0	0	0	0	0	0	890329	0
711	1579.95	18.929	0	0	0	0	0	0	880873	0
712	495.018	18.9783	0	0	0	0	0	0	863050	0
713	1316.28	18.929	0	0	0	0	0	0	859182	0
714	1492.77	19.2177	0	0	0	0	0	0	856578	562633
715	1497.13	19.1207	0	0	0	0	0	0	847078	0
716	827.042	18.929	0	0	0	0	0	0	831418	0
717	469.231	19.2137	0	0	0	0	0	0	816919	0
718	978.361	19.1207	0	0	0	0	0	0	813075	0
719	795.245	19.2615	0	0	0	0	0	0	812593	0
720	511.377	18.8805	0	0	0	0	0	0	811324	0
721	535.126	18.9783	0	0	0	0	0	0	806018	0
722	381.404	45.0031	0	0	0	0	0	0	798695	414656
723	871.118	18.9783	0	0	0	0	0	0	794651	0
724	173.147	19.1709	0	0	0	0	0	0	791162	610755
725	723.301	19.077	0	0	0	0	0	0	780573	0
726	819.053	19.3077	0	0	0	0	0	0	777947	0
727	1230.16	19.2615	0	0	0	0	0	0	768608	0
728	426.971	19.027	0	0	0	0	0	0	768012	0
729	1163.1	19.2615	0	0	0	0	0	0	756214	0
730	1879.95	19.1698	0	0	0	0	0	0	733079	0
731	591.29	19.2137	0	0	0	0	0	0	728308	0
732	395.271	25.91	0	0	0	0	0	0	716768	501120
733	1509.28	19.2137	0	0	0	0	0	0	712820	0
734	601.235	19.2137	0	0	0	0	0	0	701893	0
735	604.866	19.1698	0	0	0	0	0	0	692809	0
736	215.206	19.2137	0	0	0	0	0	0	692187	0
737	932.938	19.2137	0	0	0	0	0	0	688919	0
738	585.169	19.3077	0	0	0	0	0	0	686552	0
739	1301.62	19.027	0	0	0	0	0	0	685580	0
740	1224.69	19.1207	0	0	0	0	0	0	684007	0
741	553.402	19.214	0	0	0	0	0	0	682899	322312
742	1335.24	19.1207	0	0	0	0	0	0	682504	0
743	369.252	18.9783	0	0	0	0	0	0	675830	0
744	533.046	18.929	0	0	0	0	0	0	657386	0
745	1097.11	19.0335	0	0	0	0	0	0	646984	1583481
746	970.961	19.2615	0	0	0	0	0	0	641599	0
747	428.965	18.929	0	0	0	0	0	0	639020	0
748	580.555	19.077	0	0	0	0	0	0	637061	0
749	506.073	18.929	0	0	0	0	0	0	633626	0
750	1384.16	19.2615	0	0	0	0	0	0	631122	0
751	1544.96	18.9783	0	0	0	0	0	0	629801	0
752	973.918	19.2615	0	0	0	0	0	0	628625	0
753	995.288	19.3547	0	0	0	0	0	0	623518	0
754	1246.37	19.1207	0	0	0	0	0	0	623411	0
755	856.602	19.3077	0	0	0	0	0	0	620812	0
756	986.597	19.1207	0	0	0	0	0	0	620097	0
757	836.007	19.3077	0	0	0	0	0	0	585669	0
758	965.77	19.3077	0	0	0	0	0	0	574349	0
759	783.198	19.1436	0	0	0	0	0	0	569806	398556
760	422.162	25.9069	0	0	0	0	0	0	562426	461520
761	951.468	19.2137	0	0	0	0	0	0	562299	0
762	798.69	18.929	0	0	0	0	0	0	561148	0
763	276.31	19.3077	0	0	0	0	0	0	557973	0
764	643.35	19.2615	0	0	0	0	0	0	553242	0
765	433.094	24.3637	0	0	0	0	0	0	550406	0
766	1967.68	19.2137	0	0	0	0	0	0	548847	0
767	539.41	19.3077	0	0	0	0	0	0	548354	0
768	518.092	19.3547	0	0	0	0	0	0	541429	0
769	493.086	19.3547	0	0	0	0	0	0	488726	0
770	651.436	19.3077	0	0	0	0	0	0	463627	0
771	852.088	19.3547	0	0	0	0	0	0	458895	0
772	1568.92	19.3077	0	0	0	0	0	0	458023	0
773	841.02	19.2615	0	0	0	0	0	0	453795	0
774	880.804	18.8805	0	0	0	0	0	0	441627	0
775	1387.21	19.3547	0	0	0	0	0	0	431302	0
776	1535.29	19.2137	0	0	0	0	0	0	425594	0
777	505.972	19.3077	0	0	0	0	0	0	418264	0
778	1398.98	19.2615	0	0	0	0	0	0	414542	0
779	587.141	19.4028	0	0	0	0	0	0	409521	0
780	833.021	19.3077	0	0	0	0	0	0	407324	0
781	1233.18	19.3547	0	0	0	0	0	0	404157	0
782	528.198	19.3077	0	0	0	0	0	0	392796	0
783	1582.97	19.2615	0	0	0	0	0	0	377252	0
784	1421.19	19.3077	0	0	0	0	0	0	370599	0
785	191.245	24.1841	0	0	0	0	0	0	365038	346261
786	1206.03	19.027	0	0	0	0	0	0	362833	0
787	705.28	29.7367	0	0	0	0	0	0	358858	0
788	1360.02	19.2137	0	0	0	0	0	0	357246	0
789	700.734	18.8805	0	0	0	0	0	0	357054	0
790	549.112	19.4028	0	0	0	0	0	0	356392	0
791	1018.7	19.4523	0	0	0	0	0	0	353010	0
792	307.203	19.1698	0	0	0	0	0	0	343700	0
793	423.034	19.3077	0	0	0	0	0	0	330549	0
794	1607.12	19.3547	0	0	0	0	0	0	328346	0
795	674.559	19.2137	0	0	0	0	0	0	327274	0
796	1939.29	19.3077	0	0	0	0	0	0	326880	0
797	497.128	19.3547	0	0	0	0	0	0	319370	0
798	120.023	48.129	0	0	0	0	0	0	317259	0
799	454.171	19.2137	0	0	0	0	0	0	316755	0
800	854.643	19.4028	0	0	0	0	0	0	315657	0
801	569.778	19.2615	0	0	0	0	0	0	304794	0
802	335.255	31.2106	0	0	0	0	0	0	304628	354709
803	867.783	19.2615	0	0	0	0	0	0	304436	0
804	1264.12	19.3077	0	0	0	0	0	0	298467	0
805	359.327	25.91	0	0	0	0	0	0	292404	223315
806	429.021	52.3435	0	0	0	0	0	0	292371	0
807	613.55	19.3077	0	0	0	0	0	0	290921	0
808	357.225	51.6453	0	0	0	0	0	0	290315	0
809	705.28	31.2765	0	0	0	0	0	0	289957	0
810	1051.18	19.3077	0	0	0	0	0	0	285637	0
811	573.043	19.3077	0	0	0	0	0	0	279824	0
812	355.141	47.1693	0	0	0	0	0	0	273820	0
813	475.255	18.9783	0	0	0	0	0	0	265354	0
814	120.035	25.5502	0	0	0	0	0	0	263319	0
815	858.492	18.8338	0	0	0	0	0	0	251741	0
816	800.671	19.4028	0	0	0	0	0	0	244163	0
817	355.208	33.9853	0	0	0	0	0	0	242013	0
818	453.167	25.8447	0	0	0	0	0	0	238974	0
819	865.149	19.3077	0	0	0	0	0	0	234171	0
820	147.124	52.1538	0	0	0	0	0	0	231404	0
821	991.035	19.3077	0	0	0	0	0	0	229596	0
822	1036.61	19.2615	0	0	0	0	0	0	224916	0
823	120.052	14.4817	0	0	0	0	0	0	218055	0
824	120.023	34.4873	0	0	0	0	0	0	217410	0
825	281.162	20.508	0	0	0	0	0	0	216221	0
826	1212.63	19.2615	0	0	0	0	0	0	216031	0
827	595.872	19.3547	0	0	0	0	0	0	214403	0
828	1289.12	19.3547	0	0	0	0	0	0	213678	0
829	147.123	43.1757	0	0	0	0	0	0	213612	0
830	120.073	42.6647	0	0	0	0	0	0	212363	0
831	120.033	21.829	0	0	0	0	0	0	210720	0
832	1589.46	19.2615	0	0	0	0	0	0	208235	0
833	1689.19	18.9783	0	0	0	0	0	0	206351	0
834	405.23	25.9069	0	0	0	0	0	0	202436	449760
835	530.663	18.8338	0	0	0	0	0	0	201846	0
836	530.663	19.3547	0	0	0	0	0	0	198970	0
837	147.142	23.9267	0	0	0	0	0	0	197942	0
838	355.126	27.471	0	0	0	0	0	0	195472	0
839	543.254	19.3077	0	0	0	0	0	0	195266	0
840	1014.87	19.4028	0	0	0	0	0	0	194778	0
841	354.914	43.3653	0	0	0	0	0	0	189217	0
842	503.734	52.0245	0	0	0	0	0	0	186992	0
843	147.073	35.6657	0	0	0	0	0	0	181802	0
844	147.111	25.298	0	0	0	0	0	0	181795	0
845	281.262	28.3005	0	0	0	0	0	0	177086	0
846	520.084	19.3547	0	0	0	0	0	0	176732	0
847	355.126	43.9482	0	0	0	0	0	0	174977	0
848	147.135	28.733	0	0	0	0	0	0	173825	0
849	516.94	24.3637	0	0	0	0	0	0	171036	0
850	355.113	38.193	0	0	0	0	0	0	169813	0
851	353.085	21.1358	0	0	0	0	0	0	168278	0
852	147.083	33.1633	0	0	0	0	0	0	165210	0
853	281.095	35.228	0	0	0	0	0	0	159101	0
854	611.038	25.5502	0	0	0	0	0	0	157005	0
855	589.275	19.9353	0	0	0	0	0	0	156230	0
856	464.367	25.8447	0	0	0	0	0	0	154675	0
857	147.075	22.9698	0	0	0	0	0	0	154461	0
858	923.098	19.3547	0	0	0	0	0	0	153214	0
859	501.104	34.6713	0	0	0	0	0	0	151462	0
860	120.023	12.2478	0	0	0	0	0	0	149397	0
861	268.834	29.0437	0	0	0	0	0	0	148571	0
862	147.153	7.969	0	0	0	0	0	0	144649	0
863	674.559	46.205	0	0	0	0	0	0	144642	0
864	281.137	18.3493	0	0	0	0	0	0	139773	0
865	578.763	50.0145	0	0	0	0	0	0	138333	0
866	268.894	7.39367	0	0	0	0	0	0	136580	0
867	608.172	24.4242	0	0	0	0	0	0	135552	0
868	147.167	19.6835	0	0	0	0	0	0	134478	0
869	296.187	15.813	0	0	0	0	0	0	134329	0
870	355.126	39.484	0	0	0	0	0	0	133032	0
871	147.083	13.2675	0	0	0	0	0	0	132666	0
872	147.135	11.856	0	0	0	0	0	0	130335	0
873	270.94	7.5165	0	0	0	0	0	0	122114	0
874	293.829	40.4318	0	0	0	0	0	0	121765	0
875	281.184	26.4048	0	0	0	0	0	0	118310	0
876	601.235	24.4242	0	0	0	0	0	0	118189	0
877	668.158	12.4358	0	0	0	0	0	0	114145	0
878	625.431	51.4376	0	0	0	0	0	0	113181	188256
879	355.126	40.681	0	0	0	0	0	0	111712	0
880	535.416	30.4042	0	0	0	0	0	0	0	8992252
881	1055.29	12.069	0	0	0	0	0	0	0	6414066
882	705.352	25.476	0	0	0	0	0	0	0	5268205
883	701.522	44.9552	0	0	0	0	0	0	0	3684346
884	1075.34	18.8533	0	0	0	0	0	0	0	3153571
885	723.501	21.7455	0	0	0	0	0	0	0	2104719
886	1057.32	13.3727	0	0	0	0	0	0	0	1894499
887	723.449	23.8918	0	0	0	0	0	0	0	1742838
888	109.031	19.2212	0	0	0	0	0	0	0	1676766
889	745.437	21.8007	0	0	0	0	0	0	0	1620231
890	321.456	25.476	0	0	0	0	0	0	0	1451785
891	745.418	23.8918	0	0	0	0	0	0	0	1426106
892	1477.17	32.0495	0	0	0	0	0	0	0	1367897
893	723.315	12.2618	0	0	0	0	0	0	0	1347598
894	727.313	25.476	0	0	0	0	0	0	0	1296645
895	321.405	18.1007	0	0	0	0	0	0	0	1273088
896	723.296	11.5517	0	0	0	0	0	0	0	1271937
897	537.629	18.8533	0	0	0	0	0	0	0	1265158
898	1592.49	19.3148	0	0	0	0	0	0	0	1198883
899	741.184	25.5375	0	0	0	0	0	0	0	1195654
900	1077.19	12.069	0	0	0	0	0	0	0	1182584
901	527.573	12.069	0	0	0	0	0	0	0	1103201
902	511.381	37.235	0	0	0	0	0	0	0	1044823
903	745.38	14.1467	0	0	0	0	0	0	0	1042792
904	745.39	13.4873	0	0	0	0	0	0	0	1027758
905	543.477	39.6363	0	0	0	0	0	0	0	950829
906	723.388	19.599	0	0	0	0	0	0	0	939621
907	717.364	27.1828	0	0	0	0	0	0	0	937781
908	511.382	12.1262	0	0	0	0	0	0	0	888984
909	587.614	42.4282	0	0	0	0	0	0	0	887917
910	723.372	15.0875	0	0	0	0	0	0	0	880021
911	819.103	25.5375	0	0	0	0	0	0	0	806586
912	761.852	19.2212	0	0	0	0	0	0	0	800878
913	513.404	18.1547	0	0	0	0	0	0	0	782144
914	705.271	28.2492	0	0	0	0	0	0	0	777204
915	1260.05	19.2713	0	0	0	0	0	0	0	738465
916	631.711	44.6245	0	0	0	0	0	0	0	713428
917	812.058	30.5515	0	0	0	0	0	0	0	692558
918	1471.23	32.0975	0	0	0	0	0	0	0	684416
919	1111.08	19.2212	0	0	0	0	0	0	0	678999
920	749.343	18.2095	0	0	0	0	0	0	0	678177
921	1080.39	19.2212	0	0	0	0	0	0	0	662012
922	883.377	18.8533	0	0	0	0	0	0	0	659413
923	351.34	15.1468	0	0	0	0	0	0	0	654051
924	1119.33	18.7933	0	0	0	0	0	0	0	642173
925	1099.1	12.1262	0	0	0	0	0	0	0	637684
926	1073.24	12.8792	0	0	0	0	0	0	0	634225
927	1238.12	19.2212	0	0	0	0	0	0	0	623744
928	536.529	12.8792	0	0	0	0	0	0	0	595405
929	548.617	18.7933	0	0	0	0	0	0	0	576947
930	538.505	12.1262	0	0	0	0	0	0	0	576662
931	745.356	12.2618	0	0	0	0	0	0	0	574195
932	745.282	11.5517	0	0	0	0	0	0	0	559753
933	533.408	37.235	0	0	0	0	0	0	0	552155
934	1492.99	32.0495	0	0	0	0	0	0	0	543557
935	1075.32	16.2293	0	0	0	0	0	0	0	543152
936	1075.32	14.1467	0	0	0	0	0	0	0	542749
937	863.35	12.1262	0	0	0	0	0	0	0	540963
938	229.336	16.3977	0	0	0	0	0	0	0	540831
939	1449.1	32.0015	0	0	0	0	0	0	0	537609
940	1079.25	13.3727	0	0	0	0	0	0	0	528252
941	865.348	13.3727	0	0	0	0	0	0	0	527241
942	839.136	19.5475	0	0	0	0	0	0	0	524253
943	499.436	35.8712	0	0	0	0	0	0	0	523519
944	749.375	16.3977	0	0	0	0	0	0	0	517338
945	914.181	19.3582	0	0	0	0	0	0	0	509131
946	1124.26	19.4497	0	0	0	0	0	0	0	504739
947	723.371	17.4618	0	0	0	0	0	0	0	493816
948	513.456	25.5375	0	0	0	0	0	0	0	483618
949	809.13	25.5375	0	0	0	0	0	0	0	473349
950	1013.9	50.948	0	0	0	0	0	0	0	466338
951	745.275	44.9025	0	0	0	0	0	0	0	462926
952	1436.36	32.0975	0	0	0	0	0	0	0	462860
953	1486.88	32.0495	0	0	0	0	0	0	0	462780
954	1426.28	19.2713	0	0	0	0	0	0	0	460554
955	1449.03	19.4497	0	0	0	0	0	0	0	457209
956	749.343	39.3777	0	0	0	0	0	0	0	455756
957	723.416	16.5087	0	0	0	0	0	0	0	441367
958	293.48	18.2095	0	0	0	0	0	0	0	438802
959	703.458	13.8755	0	0	0	0	0	0	0	422632
960	375.426	25.5375	0	0	0	0	0	0	0	421019
961	1494.17	30.4042	0	0	0	0	0	0	0	420906
962	375.394	39.2518	0	0	0	0	0	0	0	418219
963	1092.59	19.2713	0	0	0	0	0	0	0	412806
964	509.326	12.1262	0	0	0	0	0	0	0	412148
965	317.559	30.4042	0	0	0	0	0	0	0	411278
966	295.442	18.0457	0	0	0	0	0	0	0	410924
967	529.631	39.4438	0	0	0	0	0	0	0	404543
968	339.4	18.2095	0	0	0	0	0	0	0	403901
969	717.32	22.783	0	0	0	0	0	0	0	397475
970	959.879	52.5627	0	0	0	0	0	0	0	396599
971	353.076	39.3155	0	0	0	0	0	0	0	390463
972	675.596	46.6088	0	0	0	0	0	0	0	388911
973	743.303	18.2095	0	0	0	0	0	0	0	387143
974	739.329	27.1828	0	0	0	0	0	0	0	386935
975	743.35	16.3977	0	0	0	0	0	0	0	381461
976	1057.85	51.147	0	0	0	0	0	0	0	377733
977	533.408	12.069	0	0	0	0	0	0	0	373279
978	1056.85	27.7247	0	0	0	0	0	0	0	370187
979	767.369	21.7455	0	0	0	0	0	0	0	367386
980	743.185	43.3945	0	0	0	0	0	0	0	361762
981	713.487	12.8095	0	0	0	0	0	0	0	361229
982	786.994	30.6035	0	0	0	0	0	0	0	357383
983	862.908	32.0975	0	0	0	0	0	0	0	355176
984	293.427	30.4527	0	0	0	0	0	0	0	354074
985	251.42	30.5008	0	0	0	0	0	0	0	348548
986	1959.02	48.8015	0	0	0	0	0	0	0	346954
987	786.994	32.1985	0	0	0	0	0	0	0	345739
988	749.333	25.5375	0	0	0	0	0	0	0	342842
989	1073.2	10.383	0	0	0	0	0	0	0	341788
990	549.666	12.1262	0	0	0	0	0	0	0	338917
991	747.3	37.2993	0	0	0	0	0	0	0	335458
992	1080.34	12.1262	0	0	0	0	0	0	0	334935
993	806.356	32.0015	0	0	0	0	0	0	0	332612
994	191.244	12.1262	0	0	0	0	0	0	0	331351
995	559.729	18.8533	0	0	0	0	0	0	0	328310
996	839.132	18.1547	0	0	0	0	0	0	0	322200
997	1473.13	19.402	0	0	0	0	0	0	0	320367
998	727.296	24.066	0	0	0	0	0	0	0	318257
999	719.381	18.731	0	0	0	0	0	0	0	315891
1000	463.517	43.339	0	0	0	0	0	0	0	315839
1001	1097.33	14.1467	0	0	0	0	0	0	0	308875
1002	767.34	23.8918	0	0	0	0	0	0	0	307285
1003	768.146	25.476	0	0	0	0	0	0	0	306596
1004	317.478	32.1467	0	0	0	0	0	0	0	305904
1005	229.336	25.5375	0	0	0	0	0	0	0	305757
1006	191.263	39.3155	0	0	0	0	0	0	0	305600
1007	353.218	15.1468	0	0	0	0	0	0	0	302816
1008	535.417	18.1547	0	0	0	0	0	0	0	300369
1009	533.408	12.6072	0	0	0	0	0	0	0	299998
1010	715.327	22.9747	0	0	0	0	0	0	0	297501
1011	743.223	38.3312	0	0	0	0	0	0	0	296260
1012	802.853	30.6035	0	0	0	0	0	0	0	296158
1013	703.24	23.3093	0	0	0	0	0	0	0	294361
1014	495.481	31.9512	0	0	0	0	0	0	0	293024
1015	745.364	17.3988	0	0	0	0	0	0	0	291668
1016	575.387	38.0628	0	0	0	0	0	0	0	291203
1017	703.216	19.4983	0	0	0	0	0	0	0	289400
1018	839.113	12.8792	0	0	0	0	0	0	0	288743
1019	513.467	14.1467	0	0	0	0	0	0	0	288370
1020	719.516	48.0273	0	0	0	0	0	0	0	287242
1021	547.687	12.8792	0	0	0	0	0	0	0	285982
1022	535.459	39.3777	0	0	0	0	0	0	0	283604
1023	611.373	39.6913	0	0	0	0	0	0	0	283064
1024	495.352	30.5515	0	0	0	0	0	0	0	282603
1025	828.155	30.5008	0	0	0	0	0	0	0	282286
1026	531.587	44.9552	0	0	0	0	0	0	0	282067
1027	1492.37	39.7493	0	0	0	0	0	0	0	277087
1028	840.226	21.859	0	0	0	0	0	0	0	275290
1029	1606.62	39.8895	0	0	0	0	0	0	0	272797
1030	277.497	30.5008	0	0	0	0	0	0	0	271988
1031	729.126	24.9092	0	0	0	0	0	0	0	271289
1032	267.63	30.5008	0	0	0	0	0	0	0	271252
1033	337.394	37.235	0	0	0	0	0	0	0	269211
1034	436.179	15.2073	0	0	0	0	0	0	0	268616
1035	1631.18	39.6363	0	0	0	0	0	0	0	266887
1036	795.04	18.1007	0	0	0	0	0	0	0	266618
1037	826.96	32.0975	0	0	0	0	0	0	0	264562
1038	513.327	19.599	0	0	0	0	0	0	0	262149
1039	790	32.1467	0	0	0	0	0	0	0	261712
1040	1057.34	37.1062	0	0	0	0	0	0	0	260758
1041	111.248	19.3582	0	0	0	0	0	0	0	259132
1042	551.222	38.0077	0	0	0	0	0	0	0	259066
1043	839.115	14.424	0	0	0	0	0	0	0	258018
1044	339.363	13.4873	0	0	0	0	0	0	0	255002
1045	745.369	16.4525	0	0	0	0	0	0	0	251217
1046	842.926	31.9017	0	0	0	0	0	0	0	250428
1047	655.517	42.3698	0	0	0	0	0	0	0	249334
1048	724.932	32.2512	0	0	0	0	0	0	0	248351
1049	847.066	30.4042	0	0	0	0	0	0	0	246695
1050	1102.24	51.3378	0	0	0	0	0	0	0	246543
1051	353.19	18.1007	0	0	0	0	0	0	0	245723
1052	706.443	23.7783	0	0	0	0	0	0	0	245171
1053	277.497	32.0975	0	0	0	0	0	0	0	244876
1054	319.426	50.6788	0	0	0	0	0	0	0	241645
1055	810.986	25.5375	0	0	0	0	0	0	0	241445
1056	339.414	14.216	0	0	0	0	0	0	0	240163
1057	705.375	13.3727	0	0	0	0	0	0	0	239740
1058	805.417	30.4527	0	0	0	0	0	0	0	234845
1059	353.19	32.1467	0	0	0	0	0	0	0	233956
1060	863.35	19.402	0	0	0	0	0	0	0	231461
1061	749.387	23.8918	0	0	0	0	0	0	0	228760
1062	765.168	32.1467	0	0	0	0	0	0	0	226795
1063	691.253	24.6448	0	0	0	0	0	0	0	225584
1064	812.126	39.3155	0	0	0	0	0	0	0	224400
1065	1043.36	12.6762	0	0	0	0	0	0	0	224231
1066	191.268	18.1547	0	0	0	0	0	0	0	223053
1067	799.372	52.224	0	0	0	0	0	0	0	219518
1068	715.286	24.4453	0	0	0	0	0	0	0	216489
1069	864.363	27.3773	0	0	0	0	0	0	0	214591
1070	581.594	31.0178	0	0	0	0	0	0	0	214012
1071	1097.34	16.2293	0	0	0	0	0	0	0	209272
1072	513.355	23.8918	0	0	0	0	0	0	0	208557
1073	713.487	11.6812	0	0	0	0	0	0	0	207811
1074	743.301	15.0255	0	0	0	0	0	0	0	207675
1075	295.423	49.6467	0	0	0	0	0	0	0	207265
1076	519.188	19.4497	0	0	0	0	0	0	0	205328
1077	865.239	30.3527	0	0	0	0	0	0	0	203590
1078	827.705	51.3378	0	0	0	0	0	0	0	203343
1079	1031.05	52.428	0	0	0	0	0	0	0	203277
1080	749.427	28.2492	0	0	0	0	0	0	0	203271
1081	409.241	14.955	0	0	0	0	0	0	0	201019
1082	706.44	21.921	0	0	0	0	0	0	0	200573
1083	455.323	30.7565	0	0	0	0	0	0	0	200116
1084	1515.59	19.4497	0	0	0	0	0	0	0	200116
1085	771.738	30.5008	0	0	0	0	0	0	0	199833
1086	1459.19	32.0495	0	0	0	0	0	0	0	197180
1087	844.968	32.1985	0	0	0	0	0	0	0	194590
1088	513.422	13.4873	0	0	0	0	0	0	0	194006
1089	855.131	30.653	0	0	0	0	0	0	0	193383
1090	812.126	38.2255	0	0	0	0	0	0	0	192611
1091	917.307	51.544	0	0	0	0	0	0	0	192102
1092	785.12	39.4438	0	0	0	0	0	0	0	190367
1093	785.073	44.8478	0	0	0	0	0	0	0	190092
1094	795.008	43.2828	0	0	0	0	0	0	0	189775
1095	706.227	33.0102	0	0	0	0	0	0	0	189349
1096	703.275	15.0875	0	0	0	0	0	0	0	189073
1097	375.341	22.1213	0	0	0	0	0	0	0	187614
1098	1078.37	27.5902	0	0	0	0	0	0	0	187551
1099	537.629	50.1637	0	0	0	0	0	0	0	187394
1100	713.487	46.3072	0	0	0	0	0	0	0	185865
1101	1101.39	13.3727	0	0	0	0	0	0	0	185243
1102	1234.8	51.7453	0	0	0	0	0	0	0	185166
1103	737.262	23.0427	0	0	0	0	0	0	0	184238
1104	1566.87	36.2145	0	0	0	0	0	0	0	183952
1105	513.425	28.2492	0	0	0	0	0	0	0	183731
1106	535.419	25.5995	0	0	0	0	0	0	0	183629
1107	1328.58	32.0495	0	0	0	0	0	0	0	183361
1108	339.358	32.9457	0	0	0	0	0	0	0	182298
1109	1524.74	39.0507	0	0	0	0	0	0	0	181879
1110	455.301	30.0458	0	0	0	0	0	0	0	180741
1111	795.04	38.278	0	0	0	0	0	0	0	180633
1112	419.272	15.0875	0	0	0	0	0	0	0	180204
1113	191.281	15.1468	0	0	0	0	0	0	0	180184
1114	949.643	50.1637	0	0	0	0	0	0	0	178137
1115	639.483	16.3977	0	0	0	0	0	0	0	177241
1116	727.271	14.286	0	0	0	0	0	0	0	175572
1117	703.324	16.4525	0	0	0	0	0	0	0	175260
1118	293.435	32.1985	0	0	0	0	0	0	0	175000
1119	1121.07	12.1937	0	0	0	0	0	0	0	174712
1120	567.38	35.8128	0	0	0	0	0	0	0	174706
1121	537.629	27.057	0	0	0	0	0	0	0	174295
1122	1486.88	52.3605	0	0	0	0	0	0	0	174073
1123	1001.39	52.4943	0	0	0	0	0	0	0	172783
1124	761.465	21.8007	0	0	0	0	0	0	0	171942
1125	625.694	35.627	0	0	0	0	0	0	0	170331
1126	706.437	21.284	0	0	0	0	0	0	0	170052
1127	529.496	12.0108	0	0	0	0	0	0	0	169388
1128	761.389	13.4873	0	0	0	0	0	0	0	169100
1129	721.309	17.2658	0	0	0	0	0	0	0	168745
1130	739.259	44.9025	0	0	0	0	0	0	0	168706
1131	726.266	12.069	0	0	0	0	0	0	0	166616
1132	795.045	16.342	0	0	0	0	0	0	0	165873
1133	853.773	52.087	0	0	0	0	0	0	0	164979
1134	1097.36	13.4873	0	0	0	0	0	0	0	164061
1135	865.334	23.8918	0	0	0	0	0	0	0	161851
1136	924.008	32.1467	0	0	0	0	0	0	0	161693
1137	1327.18	37.1713	0	0	0	0	0	0	0	159813
1138	528.478	13.7503	0	0	0	0	0	0	0	155071
1139	531.535	19.0712	0	0	0	0	0	0	0	153984
1140	1295.31	52.428	0	0	0	0	0	0	0	153809
1141	745.285	18.2095	0	0	0	0	0	0	0	153015
1142	731.668	52.4943	0	0	0	0	0	0	0	150937
1143	1392.73	39.0507	0	0	0	0	0	0	0	150862
1144	865.024	31.849	0	0	0	0	0	0	0	150145
1145	438.238	20.2488	0	0	0	0	0	0	0	149974
1146	693.187	12.1262	0	0	0	0	0	0	0	149290
1147	1057.18	31.849	0	0	0	0	0	0	0	147466
1148	771.28	25.5375	0	0	0	0	0	0	0	147086
1149	1075.28	9.91517	0	0	0	0	0	0	0	145672
1150	527.573	20.8718	0	0	0	0	0	0	0	145366
1151	749.677	46.5443	0	0	0	0	0	0	0	144716
1152	807.459	49.7785	0	0	0	0	0	0	0	143431
1153	1197.51	52.3605	0	0	0	0	0	0	0	141728
1154	775.279	19.599	0	0	0	0	0	0	0	138647
1155	865.323	12.1937	0	0	0	0	0	0	0	138254
1156	1057.23	30.5008	0	0	0	0	0	0	0	138054
1157	351.374	27.1828	0	0	0	0	0	0	0	137082
1158	701.503	12.069	0	0	0	0	0	0	0	136740
1159	746.322	15.1468	0	0	0	0	0	0	0	131494
1160	857.895	52.428	0	0	0	0	0	0	0	130963
1161	739.274	13.1962	0	0	0	0	0	0	0	130736
1162	703.338	18.8533	0	0	0	0	0	0	0	129602
1163	1633.95	38.4418	0	0	0	0	0	0	0	123048
1164	295.353	48.541	0	0	0	0	0	0	0	122599
1165	785.075	16.4525	0	0	0	0	0	0	0	122403
1166	852.002	50.1637	0	0	0	0	0	0	0	117829
1167	191.244	14.1467	0	0	0	0	0	0	0	117705
1168	1481.26	30.4042	0	0	0	0	0	0	0	111852
